# Supplementary material for: An ensemble-based approach for automated medical diagnosis of malaria using EfficientNet
Source: Springer Nature journal article supplement (doi:10.1007/s11042-022-12624-6), 2022-03-29

# efn0\_malaria\_binary

January 30, 2021

## 1 Deep Learning for Automated Medical Diagnosis of Malaria

Gonçalo Marques, Antonio Ferreras, Isabel de la Torre

*Department of Signal Theory and Communications, and Telematics Engineering University of Valladolid, Paseo de Belén, 15, 47011, Valladolid, Spain*

### 1.1 Environment

#### 1.1.1 Install required libraries

- **twine**: Utility for publishing Python packages on PyPI.
- **scikit-learn**: e Various classification, regression and clustering algorithms including support vector machines, random forests, gradient boosting, k-means
- **ImageDataAugmentor**: Custom image data generator for Keras supporting the use of modern augmentation modules
- **efficientnet**: Convolutional Neural Network model

```
[ ]: !pip install -q twine
!pip install -U -q scikit-learn
!pip install -q git+https://github.com/mjkvaak/ImageDataAugmentor
!pip install -q efficientnet
```

Building wheel for ImageDataAugmentor (setup.py) ... done

#### 1.1.2 Parameters

Set of parameters to carry out different simulations, with different models and different sizes of image sets

```
[ ]: QUICK_AND_DIRTY = False # False: Full simulation.
# True: Fast simulation for cheking the code

# To differenciate the running environment: Google Colab or Local machine
import os
COLAB = ('COLAB_GPU' in os.environ) # True if we are in a Colab environment

DEVICE = "GPU" # TPU NOT WORKING AT THE MOMENT

# Origin of Zip file
```

```

FILENAME = 'cell-images-for-detecting-malaria.zip'

if COLAB:
    DIRNAME = '/content/drive/My Drive/Colab Notebooks/MALARIA/'
else:
    DIRNAME = './'

# Where to decompress the content of the ZIP file
ORIDIR = "cell_images/"

# Local Directory for classified images (train / test / validate)
DESTDIR = "data/"

# Aleatory parameter to reproduce the experiments
SEED = 1234

if QUICK_AND_DIRTY:
    PERC = 5          # Percentage of images to deal with (5, 25, 50 ...)
    KFOLD = 2        # Numbers of folds in the k-fold process
    EPOCHS = 3       # Number of EPOCHS to run in each fold
    VERBOSE = 1      # How much the functions talk about its problems
    PATIENCE = 3     # Parameter for ReduceLROnPlateau()
else:
    PERC = 0         # Complete set 22,046 images
    KFOLD = 10       # 10-kfold method
    EPOCHS = 33      # long run
    VERBOSE = 0      # Plea, be quiet!
    PATIENCE = 6     # Parameter for ReduceLROnPlateau()

BATCH_SIZE = 16

SAVE_RESULTS = True # Only if there is only one simulation per model
FILERES = 'results.p' # Filename to store results

# Need to load the different models to get the funciotn name available
import efficientnet.tfkeras as efn
import tensorflow.keras.applications as app

## Different configuration parameters to run different models simultaneously
# modelos: Array with the parameters to perform a specific simulation with a
↳model
# [name, function, preprocessing, learningSet, width, height, freezeModel,
↳process]
# name: name of the model of the Keras application
# function: function of the Keras Application
# preprocessing: Keras function for preprocessing images

```

```

#   learningset: 'noisy-student' or 'imagenet'
#   width: Input width (in pixels) of the images required by the model
#   height: Input height (in pixels) of the images required by the model
#   freezeModel: TRUE. The base model is frozen and its parameters are not
↳trained
#   precess: True if we want to process this line
modelos = [
  ['EfficientNetB0', efn.EfficientNetB0, None, 'noisy-student', 224, 224,
↳False, True],
  ['EfficientNetB0', efn.EfficientNetB0, None, 'noisy-student', 224, 224,
↳True, False],
  ['EfficientNetB1', efn.EfficientNetB1, None, 'noisy-student', 240, 240,
↳False, False],
  ['EfficientNetB2', efn.EfficientNetB2, None, 'noisy-student', 260, 260,
↳False, False],
  ['EfficientNetB3', efn.EfficientNetB3, None, 'noisy-student', 300, 300,
↳False, False],
  ['EfficientNetB4', efn.EfficientNetB4, None, 'noisy-student', 380, 380,
↳False, False],
  ['EfficientNetB5', efn.EfficientNetB5, None, 'noisy-student', 456, 456,
↳False, False],
  ['EfficientNetB6', efn.EfficientNetB6, None, 'noisy-student', 528, 528,
↳False, False],
  ['EfficientNetB7', efn.EfficientNetB7, None, 'noisy-student', 600, 600,
↳False, False],
  ['Xception', app.Xception, app.xception.preprocess_input, 'imagenet', 229,
↳229, False, False],
  ['VGG16', app.VGG16, app.vgg16.preprocess_input, 'imagenet', 224, 224,
↳False, False],
  ['VGG19', app.VGG19, app.vgg19.preprocess_input, 'imagenet', 224, 224,
↳False, False],
  ['ResNet50', app.ResNet50, app.resnet.preprocess_input, 'imagenet', 224,
↳224, False, False],
  ['ResNet101521', app.ResNet101, app.resnet.preprocess_input, 'imagenet',
↳224, 224, False, False],
  ['ResNet152', app.ResNet152, app.resnet.preprocess_input, 'imagenet', 224,
↳224, False, False],
  ['ResNet50V2', app.ResNet50, app.resnet_v2.preprocess_input, 'imagenet',
↳224, 224, False, False],
  ['ResNet101V2', app.ResNet101V2, app.resnet_v2.preprocess_input,
↳'imagenet', 224, 224, False, False],
  ['ResNet152V2', app.ResNet152V2, app.resnet_v2.preprocess_input,
↳'imagenet', 224, 224, False, False],
  ['MobileNet', app.MobileNet, app.mobilenet.preprocess_input, 'imagenet',
↳224, 224, False, False],

```

```

    ['InceptionV3', app.InceptionV3, app.inception_v3.preprocess_input,
↪ 'imagenet', 229, 229, False, False],
    ['InceptionResNetV2', app.InceptionResNetV2, app.inception_resnet_v2.
↪ preprocess_input, 'imagenet', 229, 229, False, False],
    ['DenseNet121', app.DenseNet121, app.densenet.preprocess_input, 'imagenet',
↪ 224, 224, False, False],
    ['DenseNet169', app.DenseNet169, app.densenet.preprocess_input, 'imagenet',
↪ 224, 224, False, False],
    ['DenseNet201', app.DenseNet201, app.densenet.preprocess_input, 'imagenet',
↪ 224, 224, False, False],
    ['NASNetLarge', app.NASNetLarge, app.nasnet.preprocess_input, 'imagenet',
↪ 224, 224, False, False],
    ['NASNetMobile', app.NASNetMobile, app.nasnet.preprocess_input, 'imagenet',
↪ 224, 224, False, False]
]

print('Ready!!!')

```

Ready!!

### 1.1.3 GPU / TPU execution mode selection

Select GPU/TPU environment TPU must be selected in the Google Colab environment

From Kaggle: [Triple Stratified KFold with TFRecords](#) (Chris Deotte)

(TPU: Not working at the moment / can't be used)

```

[ ]: import tensorflow as tf

if DEVICE == "TPU":
    print('connecting to TPU...')
    try:
        tpu = tf.distribute.cluster_resolver.TPUClusterResolver()
        print('Running on TPU', tpu.master())
    except ValueError:
        print('Could not connect to TPU')
        tpu = None

if tpu:
    try:
        print('Initializing TPU...')
        tf.config.experimental_connect_to_cluster(tpu)
        tf.tpu.experimental.initialize_tpu_system(tpu)
        strategy = tf.distribute.TPUStrategy(tpu)
        print('TPU initialized')
    except _:
        print('Failed to initialize TPU!!!')

```

```

else:
    DEVICE = "GPU"

if DEVICE != 'TPU':
    print("Using default strategy for CPU and single GPU")
    strategy = tf.distribute.get_strategy()

if DEVICE == 'GPU':
    print("Num Available GPUs:",
          len(tf.config.experimental.list_physical_devices('GPU')))

AUTO = tf.data.experimental.AUTOTUNE
print(f'AUTO: {AUTO}')
REPLICAS = strategy.num_replicas_in_sync
print(f'REPLICAS: {REPLICAS}')

print("\ntf.__version__ is", tf.__version__)
print("tf.keras.__version__ is:", tf.keras.__version__)

```

```

Using default strategy for CPU and single GPU
Num Available GPUs: 1
AUTO: -1
REPLICAS: 1

```

```

tf.__version__ is 2.3.0
tf.keras.__version__ is: 2.4.0

```

## 1.2 Input

Mounting Local Drive and download the images (only if needed: Colab environment)

In Local environment, the zip file is already present and previously extracted

```

[ ]: if COLAB:
    # Mount drive
    from google.colab import drive
    import shutil
    import os
    from zipfile import ZipFile

    drive.mount("/content/drive")
    shutil.copy(DIRNAME+FILENAME, FILENAME)
    ZipFile(FILENAME, 'r').extractall()
    os.remove(FILENAME)
    print(ORIDIR+' : {} files'.format(len(os.listdir(ORIDIR))))

TIPOS = os.listdir(ORIDIR)          # Automatic List of classes extracted from
↳ directorios

```

```
print('Types: {}'.format(TIPOS))
```

Types: ['Parasitized', 'Uninfected']

### 1.3 Configuration

1. Import the images
2. Create two directories of the images with their labels according to classes
3. Configure training, testing and validate the model using stratified 10-fold cross validation.

#### Create DataFrames

```
[ ]: import pandas as pd
import sklearn.model_selection
import random
import shutil
import os

ficheros = [] # The list of image file names

if os.path.isdir(DESTDIR): # remove dir if exists (to avoid errors)
    shutil.rmtree(DESTDIR)

os.mkdir(DESTDIR) # create destinate directory

df_total = pd.DataFrame() # dataframe for filenames + class

for tipo in TIPOS:
    ficheros = os.listdir(ORIDIR+tipo)
    df_total = pd.concat([df_total,
                          pd.DataFrame(list(zip(ficheros,
                                                [tipo]*(len(ficheros)))),
                                       columns=['file', 'label']))])
    for fichero in ficheros: # cleaning files from stange types
        if fichero.lower().endswith(('.png', '.jpg', '.jpeg',
                                     '.tiff', '.bmp', '.gif')):
            shutil.copy(ORIDIR+tipo+'/'+fichero, DESTDIR)
        else:
            os.remove(ORIDIR+tipo+'/'+fichero)
            print(f'Invalid file {fichero}')
            df_total = df_total.drop(df_total[df_total['file']==fichero].index)

if PERC != 0: # Keep only a fraction of images to speed up the simulation
    df_total = df_total.sample(n=round(len(df_total)*PERC/100.))

# Randomly split the images: 0.80 for learning / 0.20 for validating
df_learn, df_val = sklearn.model_selection.train_test_split(df_total,
                                                            test_size=0.2)
df_learn = pd.concat([df_learn, pd.get_dummies(df_learn['label'])], axis=1)
```

```
df_val = pd.concat([df_val, pd.get_dummies(df_val['label'])], axis=1)

print("DataFrame Learn : {} files".format(len(df_learn)))
print("DataFrame Learn : {} files".format(len(df_val)))
```

DataFrame Learn : 22046 files

DataFrame Learn : 5512 files

## 1.4 Display random images

For testing purposes

```
[ ]: import random
import matplotlib.pyplot as plt

N = 9 # Number of images of each class to display
for tipo in TIPOS:
    ficheros = list(df_total['file'][df_total['label']==tipo])
    images = random.sample(ficheros, N)
    print("\nImage Type: {}".format(tipo))
    plt.figure(figsize=(8,8))
    for i in range(N):
        plt.subplot(3, int(N/3),i+1)
        img = plt.imread(DESTDIR+images[i])
        plt.imshow(img)
        plt.axis('off')
    plt.tight_layout()
    plt.show()

del [ficheros, df_total]
```

Image Type: Parasitized

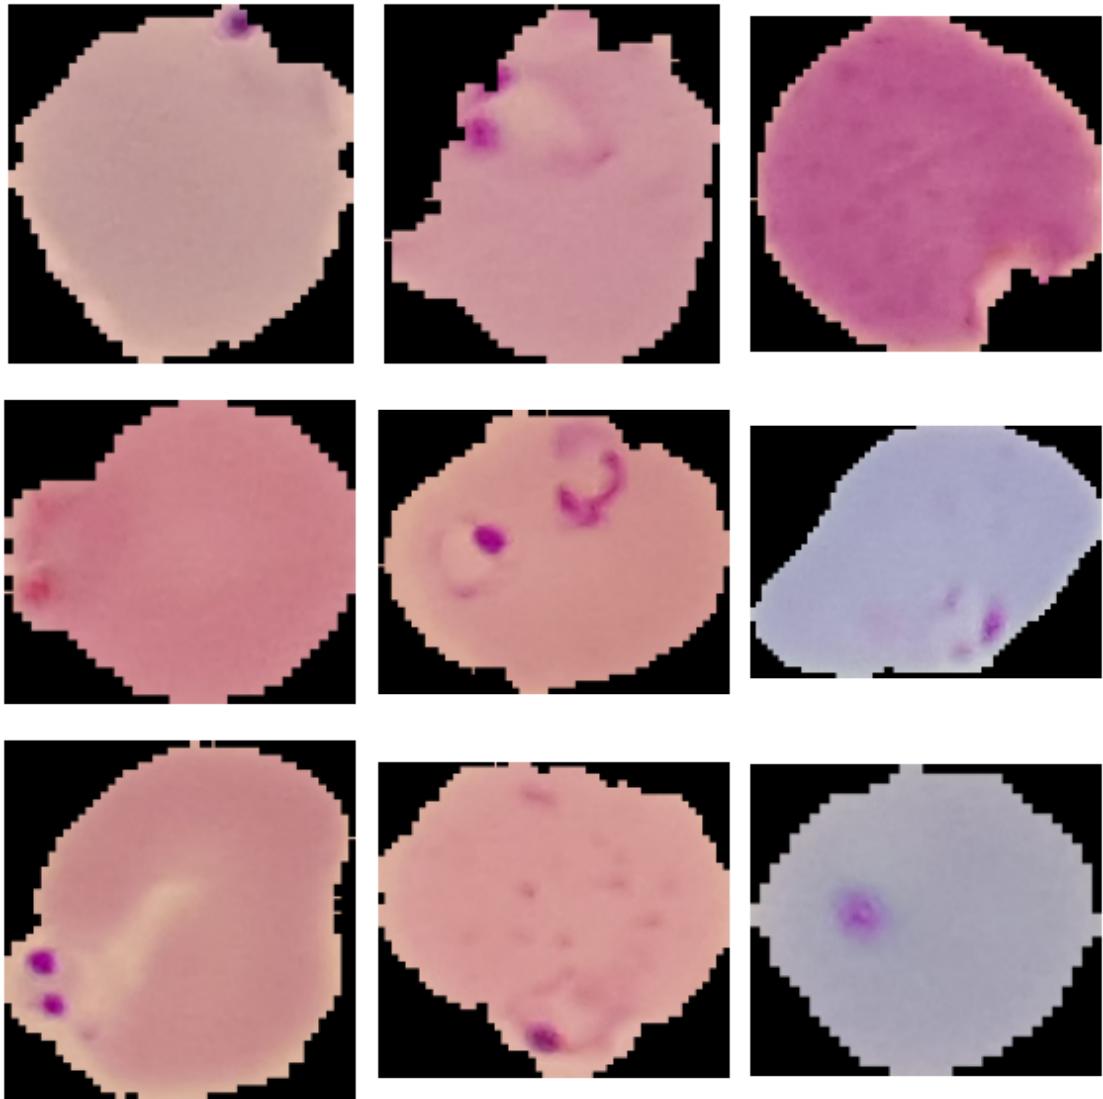

Image Type: Uninfected



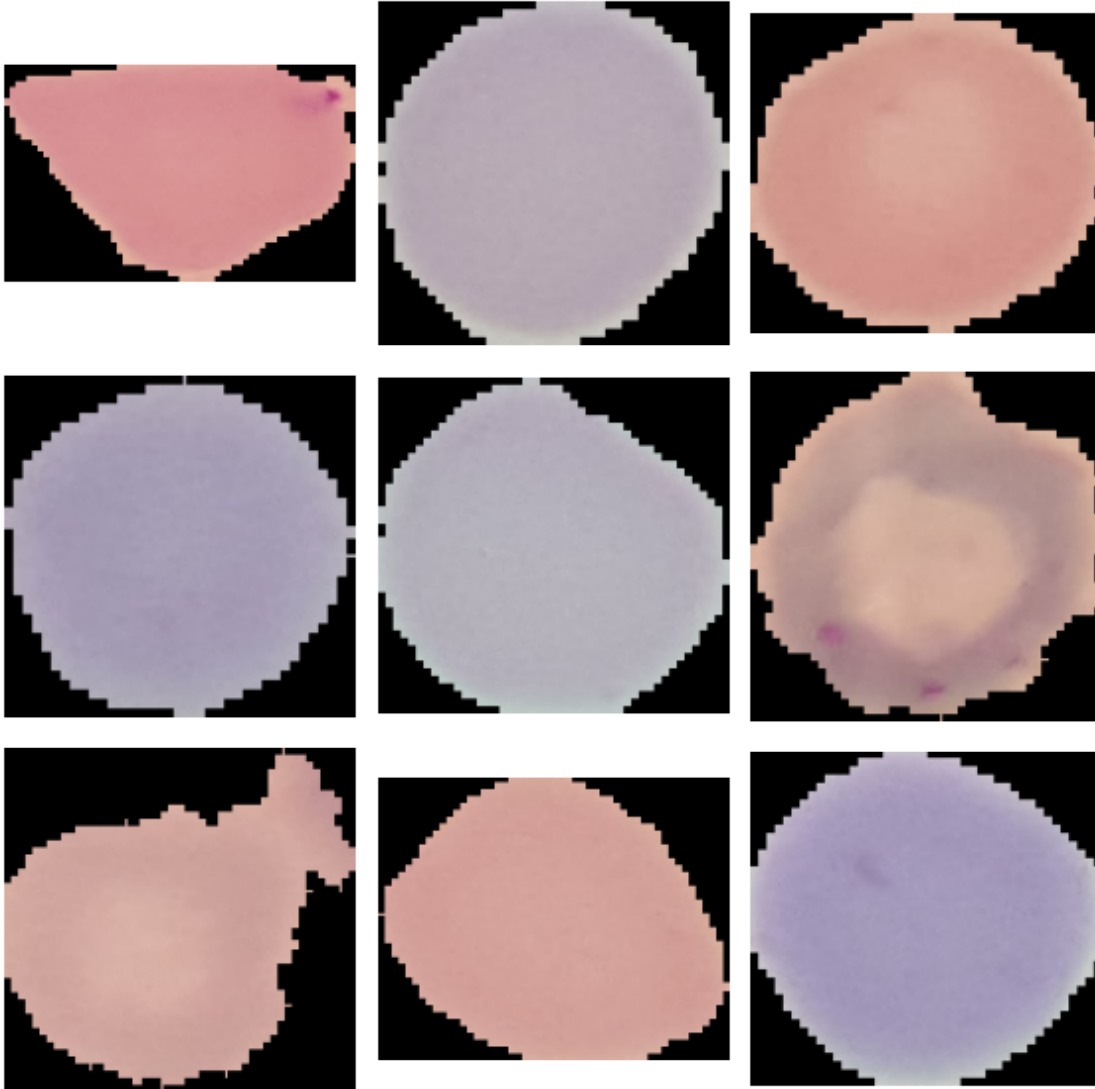

## 2 MODEL

### 2.1 Auxiliary functions for plotting

```
[ ]: from sklearn.metrics import confusion_matrix
import matplotlib.pyplot as plt
import seaborn as sns
from sklearn.metrics import roc_curve, auc
from itertools import cycle

# Plot confusion matrix
# y_true: real values
# y_pred: predicted values
```

```

# tipos: list with the names of the classes
def plot_confussion_matrix(y_true, y_pred, tipos):
    cm = confusion_matrix(y_true.values.argmax(axis = 1), y_pred.argmax(axis =
↳1))
    plt.figure(figsize=(6.5, 5))
    sns.heatmap(cm, annot=True, fmt="d")
    plt.title('\nAccuracy:{0:.4f}'.format(accuracy_score(y_true, y_pred)))
    plt.ylabel('True Class')
    plt.xlabel('Predicted Class')
    plt.xticks(np.arange(len(tipos))+0.5, tipos)
    plt.yticks(np.arange(len(tipos))+0.25, tipos)
    plt.show()

# Plot ROC (Area under the curve)
# y_true: real values
# y_pred: predicted values
# tipos: list with the names of the classes
def plot_roc_curve(y_true, y_pred, tipos):
    plt.style.use('ggplot')
    plt.figure(figsize=(6.5, 5))
    fpr = dict()
    tpr = dict()
    roc_auc = dict()
    n_classes=len(tipos)
    for i in range(n_classes):
        fpr[i], tpr[i], _ = roc_curve(y_true.values[:, i], y_pred[:, i])
        roc_auc[i] = auc(fpr[i], tpr[i])

# Max. 6 classes
colors = cycle(['blue', 'red', 'green', 'black', 'violet', 'brown'])

for i, color in zip(range(n_classes), colors):
    plt.plot(fpr[i], tpr[i], color=color, lw=1.5, \
             label='ROC curve - {0} (area = {1:0.6f})'\
             .format(TIPOS[i], roc_auc[i]))
plt.plot([0, 1], [0, 1], linestyle='--', color = 'grey', lw=1)
plt.xlim([-0.05, 1.0])
plt.ylim([0.0, 1.05])
plt.xlabel('False Positive Rate')
plt.ylabel('True Positive Rate')

if n_classes == 2:
    plt.title('Receiver Operating Curve (binary-class)')
else:
    plt.title('Receiver operating Curve (multi-class)')
plt.legend(loc="lower right")
plt.show()

```

```

# Plot history of the training
# hist: data to plot
# model: nName of the model
# fold: number of the fold of the k-fold algorithm
def plot_history(hist, model, fold):
    plt.figure(figsize=(8,5))
    plt.plot(hist['accuracy'],'-o',label='Train ACC',color='#ff7f0e')
    plt.plot(hist['val_accuracy'],'-o',label='Val ACC',color='#1f77b4')
    x = np.argmax(hist['val_accuracy']); y = np.max( hist['val_accuracy'])
    xdist = plt.xlim()[1] - plt.xlim()[0]; ydist = plt.ylim()[1] - plt.ylim()[0]
    plt.scatter(x,y,s=200,color='#1f77b4');
    plt.text(x-0.03*xdist,y-0.13*ydist,'max acc\n%.4f'%y,size=14)
    plt.ylabel('Accurary',size=14);
    plt.xlabel('Epoch',size=14)
    plt.legend(loc=2)

    plt2 = plt.gca().twinx()
    plt2.plot(hist['loss'],'-o',label='Train Loss',color='#2ca02c')
    plt2.plot(hist['val_loss'],'-o',label='Val Loss',color='#d62728')
    x = np.argmin(hist['val_loss'] ); y = np.min(hist['val_loss'] )
    ydist = plt.ylim()[1] - plt.ylim()[0]
    plt.scatter(x,y,s=200,color='#d62728');
    plt.text(x-0.03*xdist,y+0.05*ydist,'min loss\n%.4f'%y, size=11)
    plt.ylabel('Loss',size=14)
    plt.title('%s - FOLD : %i'%(model, fold), size=18)
    plt.legend(loc=3)
    plt.show()

print('Functions created!')

```

Functions created!

## 2.2 Auxiliary Functios for modeling

```

[ ]: from tensorflow.keras.models import Model
from tensorflow.keras.layers import Dropout, Dense, GlobalAveragePooling2D
from tensorflow.keras.callbacks import ModelCheckpoint,ReduceLRonPlateau
import tensorflow as tf

# Create Keras model
# fnctn : function application of the base model
# wghs: pretrained weights to us in the model
# wdth: input width of the model
# hght: input heigh of the model
# frz: (Boolean) ;train base model parameters?
def create_model(fnctn, wghs, wdth, hght, frz):

```

```

model = fnctn(weights = wghs, include_top=False,
              input_shape = (width, hght,3))

if frz:
    model.trainable = False # FIXING model

x = model.output
x = GlobalAveragePooling2D()(x)
x = Dense(128, activation="relu")(x)
x = Dropout(0.3)(x)
x = Dense(64, activation="relu")(x)
x = Dropout(0.3)(x)
x = Dense(32, activation="relu")(x)
x = Dropout(0.3)(x)
predictions = Dense(len(TIPOS), activation="softmax")(x)
model = Model(inputs=model.input, outputs=predictions)
return model

# Callbacks for the model
# ReduceLRonPlateau: reduce the learning rate when learning diminishes
# ModelCheckPoint: to store models for future use
def create_callbacks(fold):
    return [ReduceLRonPlateau(monitor = 'val_loss', factor = 0.5,
                              patience = PATIENCE, min_lr = 0.000001),
            ModelCheckpoint('model_{}.hdf5'.format(fold), save_best_only = True,
                            monitor = 'val_loss', mode='min',
                            ↪save_freq='epoch')]

# Create custom_loss with smoothing parameter
def custom_loss(y_true, y_pred):
    return tf.keras.losses.categorical_crossentropy(y_true, y_pred,
                                                    label_smoothing=0.1)

# Convert y_pred to 0 or 1, selecting the maximum value of softmax
def binary_decission(y_pred, tipos):
    decission = np.zeros((len(y_pred), len(tipos)), dtype=int)
    for i in range(len(y_pred)):
        decission[i, int(np.where(y_pred[i] == np.amax(y_pred[i]))[0])] = 1
    return decission

print('Functions created!')

```

Functions created!

## 2.3 Augmentation

Use [alumentations](#) for image augmentation. The purpose of image augmentation is to create new training samples from the existing data. We use the following transformation in our model:

- Flip: Flip the input either horizontally, vertically or both horizontally and vertically.
- Transpose: Transpose the input by swapping rows and columns.
- IAAGaussianNoise: Add gaussian noise to the input image.
- GaussNoise: Apply gaussian noise to the input image.
- MotionBlur: Apply motion blur to the input image using a random-sized kernel.
- MedianBlur: Blur the input image using a median filter with a random aperture linear size.
- Blur: Blur the input image using a random-sized kernel.
- ShiftScaleRotate: Randomly apply affine transforms: translate, scale and rotate the input.
- OpticalDistortion: Apply an optical distortion to the full image.
- GridDistortion: Apply a grid distortion with padding.
- IAAPiecewiseAffine: Place a regular grid of points on the input and randomly move the neighbourhood of these point around via affine transformations.
- CLAHE: Apply Contrast Limited Adaptive Histogram Equalization to the input image.
- IAASharpen: Sharpen the input image and overlays the result with the original image. This augmentation is deprecated. Please use Sharpen instead.
- IAASharpness: Emboss the input image and overlays the result with the original image.
- RandomContrast: Randomly change contrast of the input image.
- RandomBrightness: Randomly change brightness and contrast of the input image.

```
[ ]: from albumentations import *

aug=Compose([RandomRotate90(),
             Flip(),
             Transpose(),
             OneOf([IAAGaussianNoise(),
                    GaussNoise(),], p=0.2),
             OneOf([MotionBlur(p=.2),
                    MedianBlur(blur_limit=3, p=.1),
                    Blur(blur_limit=3, p=.1)], p=0.3),
             ShiftScaleRotate(shift_limit=0.0625,
                               scale_limit=0.2,
                               rotate_limit=45, p=.2),
             OneOf([OpticalDistortion(p=0.3),
                    GridDistortion(p=.1),
                    IAAPiecewiseAffine(p=0.3)], p=0.3),
             OneOf([CLAHE(clip_limit=2),
                    IAASharpen(),
                    IAASharpness(),
                    RandomContrast(),
                    RandomBrightness()], p=0.3),
             ], p=1)

print('Ready!')
```

Ready!

## 2.4 Training

For each model:

- Define augmentation pipeline using Compose function of albumentation library.
- Create the data generator as an object of the ImageDataAugmentor library and configure the augmentation pipeline obtained previously. Do this for train / test / validation dataset.
- Create the model using the appropriate function and dense layers with relu activation function and an output layer with a softmax activation function.
- Compile the model using the ADAM optimizer and Categorical\_Crossentropy function for loss calculation.
- Model fitting using 33 epochs and ReduceLronPlateau function to reduce the learning rate when the metrics stops improving.
- Save the model to be used for validation testing and ensemble model.
- Configure testing dataset.
- Generate performance score values for each fold.
  1. Model loss graph.
  2. Model Accuracy graph.
  3. Test Classification Report.
  4. Validate Model.
  5. AUC-ROC curve.
  6. Confusion Matrix.
  7. Validation Classification Report.
- Generate performance score values dor ensembled model
  1. Ensembled Classification Report.
  2. AUC-ROC curve.
  3. Confusion Matrix.

```
[ ]: from ImageDataAugmentor.image_data_augmentor import *

from tensorflow.keras.optimizers import Adam
from sklearn.model_selection import StratifiedKFold
import gc
from sklearn.metrics import classification_report, accuracy_score, f1_score
from datetime import datetime
import pickle

# To reproduce results. SEED defined in the PARAMETER section
random.seed(SEED)

# If saving results is desired
if SAVE_RESULTS:
    total_results = {'epochs' : EPOCHS, 'batch_size' : BATCH_SIZE,
                    'filename' : FILENAME, 'KFOLD' : KFOLD}

# Loop to simulate. modelos list defined in the parameter section
```

```

for (nombre, funcion, preproc, pesos, ancho, alto, freeze, procesar) in modelos:

    # Skip model if required
    if not procesar:
        continue
    else: # Presentation for starting simulation
        print('#'*50) ; print('### ', nombre); print('#'*50);
        if freeze:
            print('Model frozen....')

    # Start point for Time measurement
    start_model = datetime.now()

    # List of result values initialization
    test_true = {}; test_pred = {}; val_true = {}; val_pred = {}

    # Define custom image data generator with support for albumentations
    data_gen = ImageDataAugmentor(rescale=1/255, augment = aug,
                                   preprocess_input = preproc)

    # Stratified K-Folds cross-validator. Provides train/test indices to split
    ↪data
    # in train/test sets. KFOLD: number of folds; defined in PARAMETER section
    kf = StratifiedKFold(KFOLD, shuffle = True, random_state = 50)

    # Loop for K iterations (from k-fold)
    for fold, (train_index, test_index) in enumerate(kf.split(df_learn,
                                                             df_learn['label'])):

        # fine grain measurement for each fold
        start_fold = datetime.now()

        # presentation
        print('#'*50) ;print('** Model: {} fold: {} '.format(nombre, fold))
        print('Training...')

        # Create sets of train and test images
        df_train = df_learn.iloc[train_index,:]
        df_test = df_learn.iloc[test_index,:]

        # Create data generator for train, test and validation
        # use de ImageDataAugmentor object previously defined
        train_generator = data_gen.flow_from_dataframe(
            df_train, directory= 'data',
            target_size=(ancho, alto), x_col = "file", y_col = TIPOS,
            class_mode = 'raw', shuffle = True, batch_size = BATCH_SIZE)

        test_generator = data_gen.flow_from_dataframe(

```

```

df_test, directory='data',
target_size=(ancho, alto), x_col = "file", y_col = TIPOS,
class_mode = 'raw', shuffle = False, batch_size = BATCH_SIZE)

val_generator = data_gen.flow_from_dataframe(
    df_val, directory='data',
    target_size = (ancho, alto), x_col = "file", y_col = TIPOS,
    class_mode = 'raw', shuffle = False, batch_size = BATCH_SIZE)

# Create the model
model = create_model(funcion, pesos, ancho, alto, freeze)

# Compile the model
model.compile(optimizer=Adam(0.0001), loss=custom_loss,
              metrics=['accuracy'])

# Train
results = model.fit(train_generator, epochs = EPOCHS,
                    steps_per_epoch = train_generator.n/BATCH_SIZE,
                    validation_data = test_generator,
                    validation_steps = test_generator.n/BATCH_SIZE,
                    callbacks = create_callbacks(fold),
                    verbose = VERBOSE)

# Plot history
plot_history(results.history, nombre, fold)

# Get best model of the training phase for this fold
model.load_weights('model_{}.hdf5'.format(fold))

# Predict class for test images
print('Predicting...')
test_generator.reset()
test_true[f'fold{fold}'] = df_test.iloc[:,2:]
test_pred[f'fold{fold}'] = model.predict(test_generator,
                                         steps=test_generator.n/BATCH_SIZE,
                                         verbose=VERBOSE)

# Get and print/plot results for testing
decission = binary_decission(test_pred[f'fold{fold}'], TIPOS)
print('Accuracy {:.6f}'.format(accuracy_score(test_true[f'fold{fold}'],
                                              decission)))
print(classification_report(test_true[f'fold{fold}'], decission,
                            target_names = TIPOS, digits = 6))

# Validate results with the appropriate set of samples
print('Validating...')

```



```

val_generator.reset()
val_true[f'fold{fold}'] = df_val.iloc[:,2::]
val_pred[f'fold{fold}'] = model.predict(val_generator,
                                        steps=val_generator.n/
↳BATCH_SIZE,
                                        verbose=1)

# Get and print/plot results for validation
plot_roc_curve(val_true[f'fold{fold}'], val_pred[f'fold{fold}'],TIPOS)
decission = binary_decission(val_pred[f'fold{fold}'], TIPOS)
plot_confussion_matrix(val_true[f'fold{fold}'], decission, TIPOS)
print(classification_report(val_true[f"fold{fold}"], decission,
                           target_names = TIPOS, digits = 6))

# Timmings for each k-fold iteration
print('End of Fold {} - Elapsed Time: {}'.format(fold, datetime.now() -
↳start_fold))

# End of K-FOLD proccess. Clean environment
del model, data_gen, train_generator
tf.keras.backend.clear_session()
gc.collect()

# Calculate ensembled results from the K models
print('\n Validate ensembled results...')
val_ensemble = np.array([[0.,0.]]*len(df_val))
for fold in range(KFOLD):
    val_ensemble = val_pred[f'fold{fold}'] + val_ensemble
val_ensemble = np.divide(val_ensemble, np.array([KFOLD,KFOLD]))

# Print / Plot results
val_true = df_val.iloc[:,2::]
plot_roc_curve(val_true, val_ensemble,TIPOS)
decission = binary_decission(val_ensemble, TIPOS)
print('Accuracy {:.6f}'.format(accuracy_score(val_true, decission)))
plot_confussion_matrix(val_true, decission, TIPOS)
f1 = f1_score(val_true, decission, average="macro")
print('f1 score: {:.6f}'.format(f1))
print(classification_report(val_true, decission,
                           target_names = TIPOS, digits = 6))

# Total time spent
time_taken = datetime.now() - start_model;

print('\n END Model {} - Elapsed Time: {}'.format(nombre,
                                                datetime.now() - start_model))

# Saving results

```

```

if SAVE_RESULTS:
    total_results[nombre] = {'test_true' : test_true, 'test_pred' :
    ↪test_pred,
                                'val_true' : val_true, 'val_pred' : val_pred,
                                'time_taken' : time_taken }
if SAVE_RESULTS:
    with open(DIRNAME+FILERES, "wb") as f:
        pickle.dump(total_results, f)

```

Using TensorFlow backend.

```

#####
### EfficientNetB0
#####
*****
** Model: EfficientNetB0 fold: 0
Training..
Found 19841 validated image filenames.
Found 2205 validated image filenames.
Found 5512 validated image filenames.
WARNING:tensorflow:Callbacks method `on_train_batch_end` is slow compared to the
batch time (batch time: 0.1006s vs `on_train_batch_end` time: 0.2411s). Check
your callbacks.

```

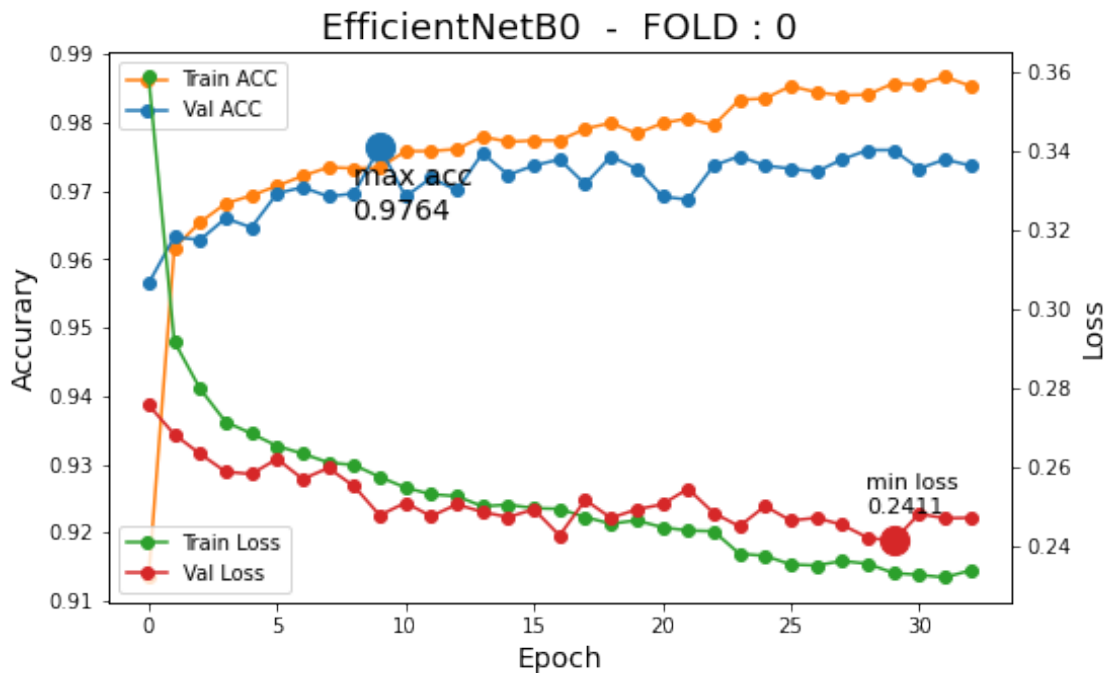

Predicting...  
Accuracy 0.974603

|              | precision | recall   | f1-score | support |
|--------------|-----------|----------|----------|---------|
| Parasitized  | 0.977231  | 0.971920 | 0.974569 | 1104    |
| Uninfected   | 0.971996  | 0.977293 | 0.974638 | 1101    |
| micro avg    | 0.974603  | 0.974603 | 0.974603 | 2205    |
| macro avg    | 0.974614  | 0.974607 | 0.974603 | 2205    |
| weighted avg | 0.974617  | 0.974603 | 0.974603 | 2205    |
| samples avg  | 0.974603  | 0.974603 | 0.974603 | 2205    |

Validating...

345/344 [=====] - 109s 317ms/step

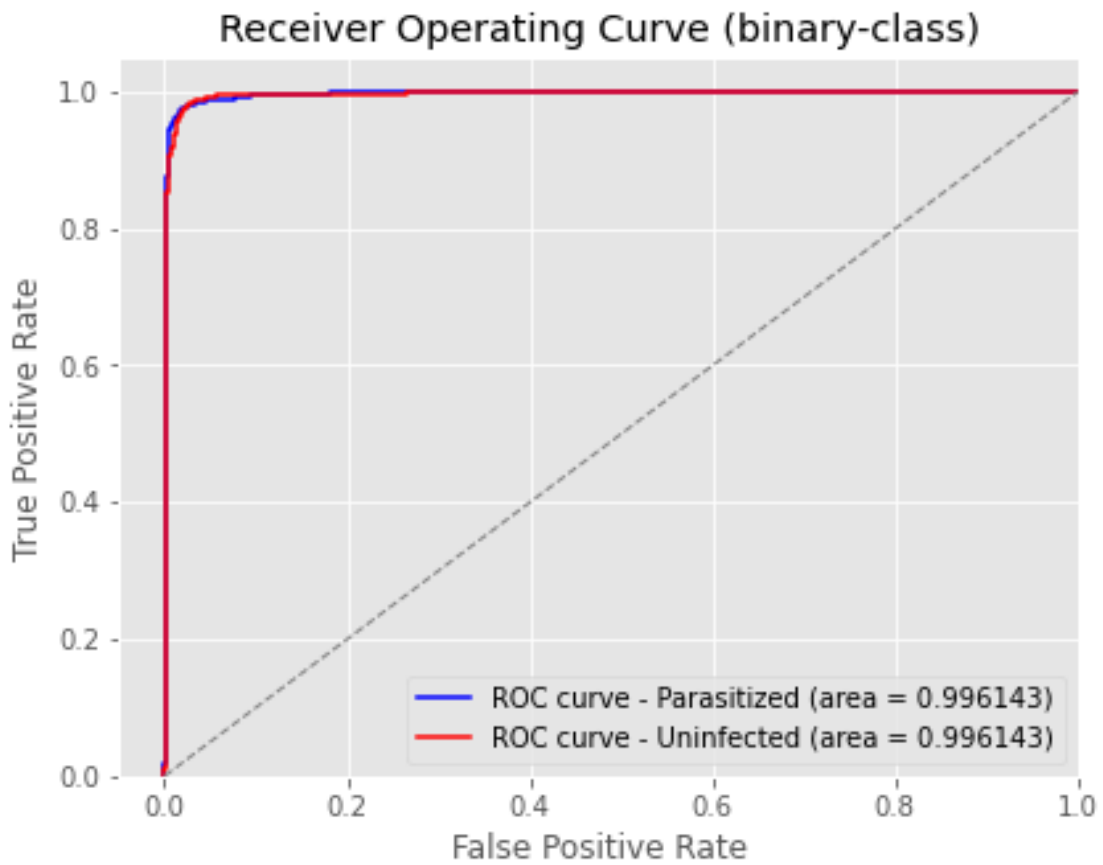

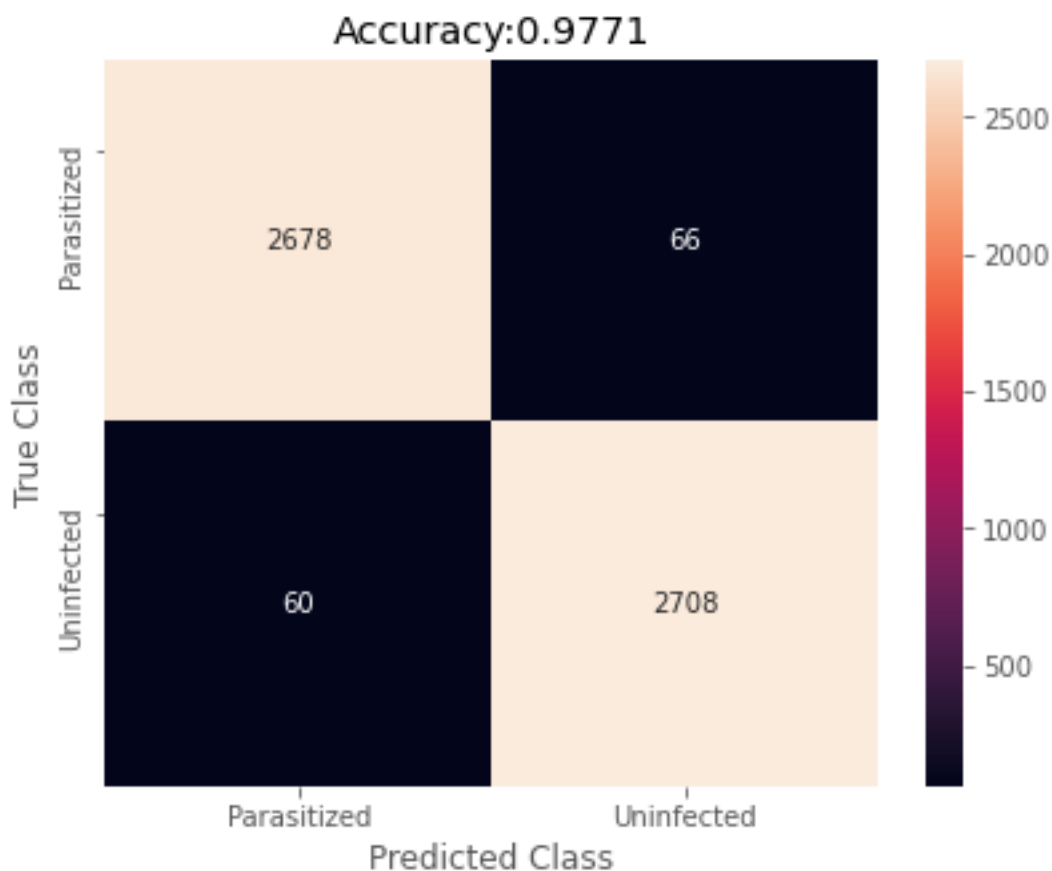

|              | precision | recall   | f1-score | support |
|--------------|-----------|----------|----------|---------|
| Parasitized  | 0.978086  | 0.975948 | 0.977016 | 2744    |
| Uninfected   | 0.976208  | 0.978324 | 0.977265 | 2768    |
| micro avg    | 0.977141  | 0.977141 | 0.977141 | 5512    |
| macro avg    | 0.977147  | 0.977136 | 0.977140 | 5512    |
| weighted avg | 0.977143  | 0.977141 | 0.977141 | 5512    |
| samples avg  | 0.977141  | 0.977141 | 0.977141 | 5512    |

End of Fold 0 - Elapsed Time: 4:57:09.745551

\*\*\*\*\*

\*\* Model: EfficientNetB0 fold: 1

Training...

Found 19841 validated image filenames.

Found 2205 validated image filenames.

Found 5512 validated image filenames.

WARNING:tensorflow:Callbacks method `on\_train\_batch\_end` is slow compared to the

batch time (batch time: 0.1017s vs `on\_train\_batch\_end` time: 0.2404s). Check your callbacks.

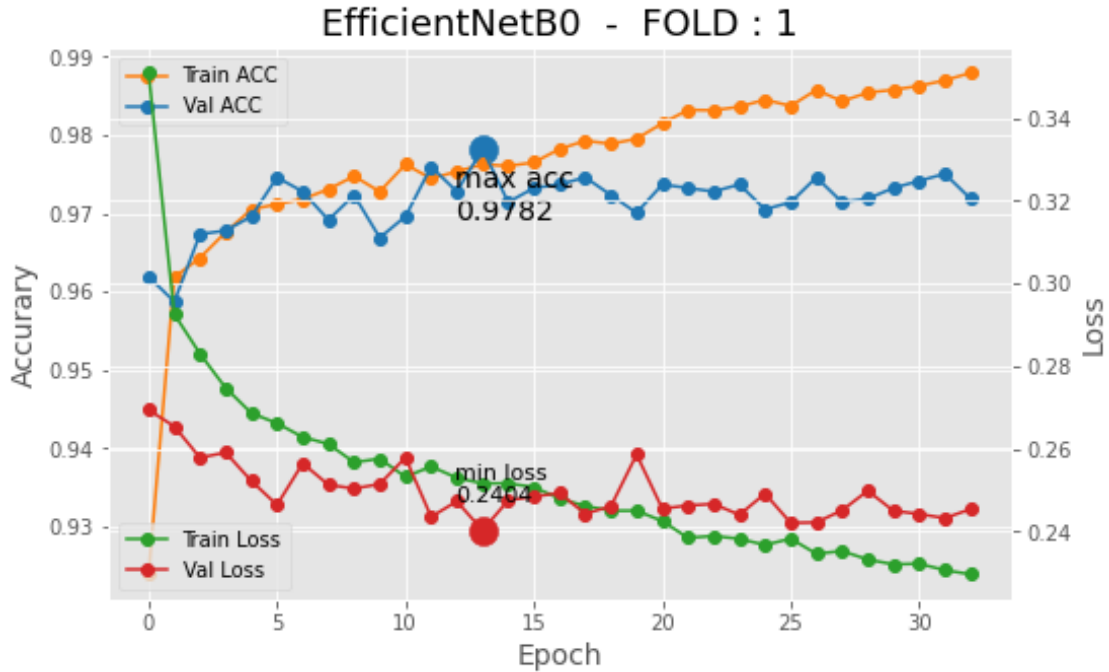

Predicting...

Accuracy 0.977324

|              | precision | recall   | f1-score | support |
|--------------|-----------|----------|----------|---------|
| Parasitized  | 0.978221  | 0.976449 | 0.977335 | 1104    |
| Uninfected   | 0.976428  | 0.978202 | 0.977314 | 1101    |
| micro avg    | 0.977324  | 0.977324 | 0.977324 | 2205    |
| macro avg    | 0.977325  | 0.977325 | 0.977324 | 2205    |
| weighted avg | 0.977326  | 0.977324 | 0.977324 | 2205    |
| samples avg  | 0.977324  | 0.977324 | 0.977324 | 2205    |

Validating...

345/344 [=====] - 84s 243ms/step

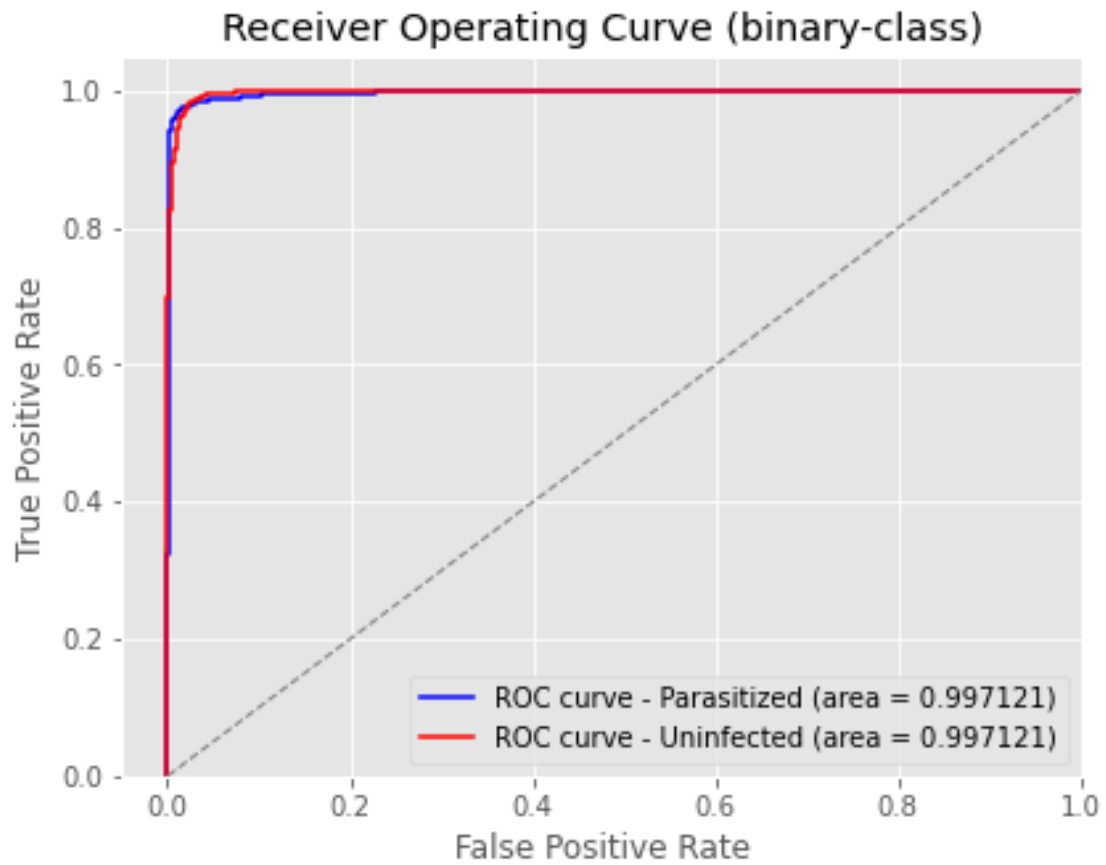

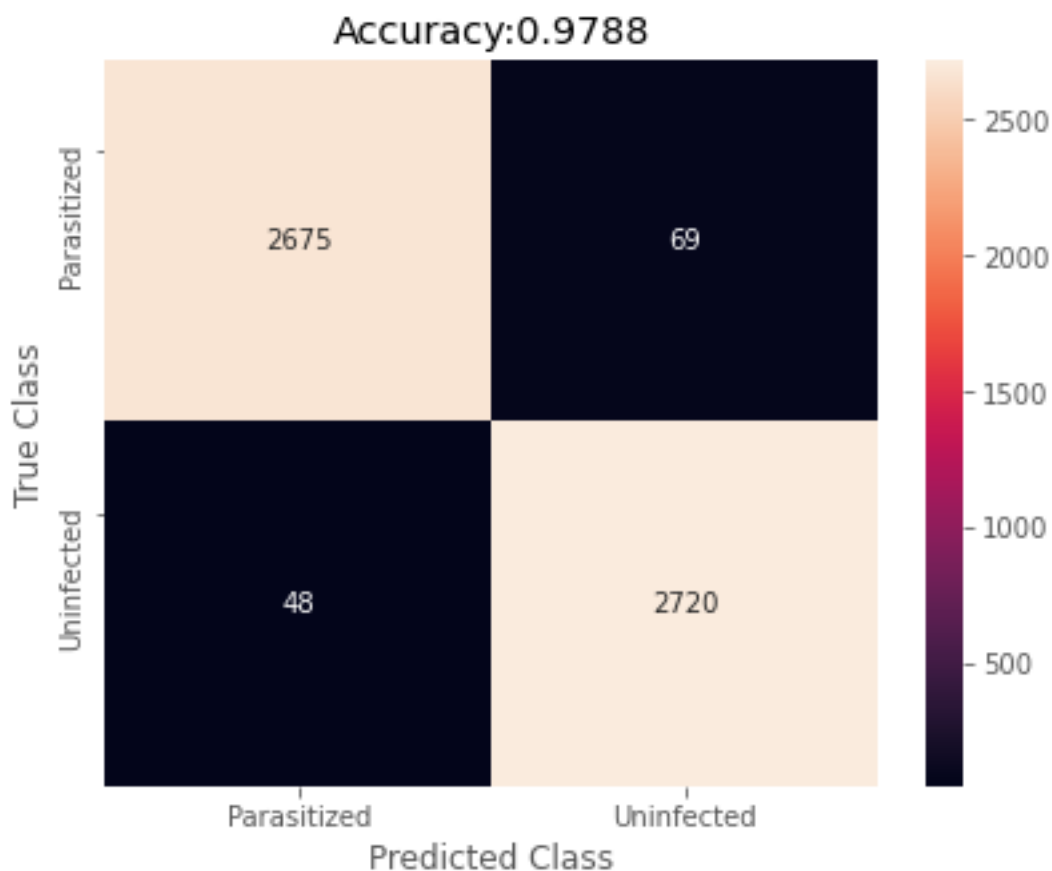

|              | precision | recall   | f1-score | support |
|--------------|-----------|----------|----------|---------|
| Parasitized  | 0.982372  | 0.974854 | 0.978599 | 2744    |
| Uninfected   | 0.975260  | 0.982659 | 0.978945 | 2768    |
| micro avg    | 0.978774  | 0.978774 | 0.978774 | 5512    |
| macro avg    | 0.978816  | 0.978757 | 0.978772 | 5512    |
| weighted avg | 0.978801  | 0.978774 | 0.978773 | 5512    |
| samples avg  | 0.978774  | 0.978774 | 0.978774 | 5512    |

End of Fold 1 - Elapsed Time: 4:43:37.369983

\*\*\*\*\*

\*\* Model: EfficientNetB0 fold: 2

Training...

Found 19841 validated image filenames.

Found 2205 validated image filenames.

Found 5512 validated image filenames.

WARNING:tensorflow:Callbacks method `on\_train\_batch\_end` is slow compared to the

batch time (batch time: 0.1007s vs `on\_train\_batch\_end` time: 0.2453s). Check your callbacks.

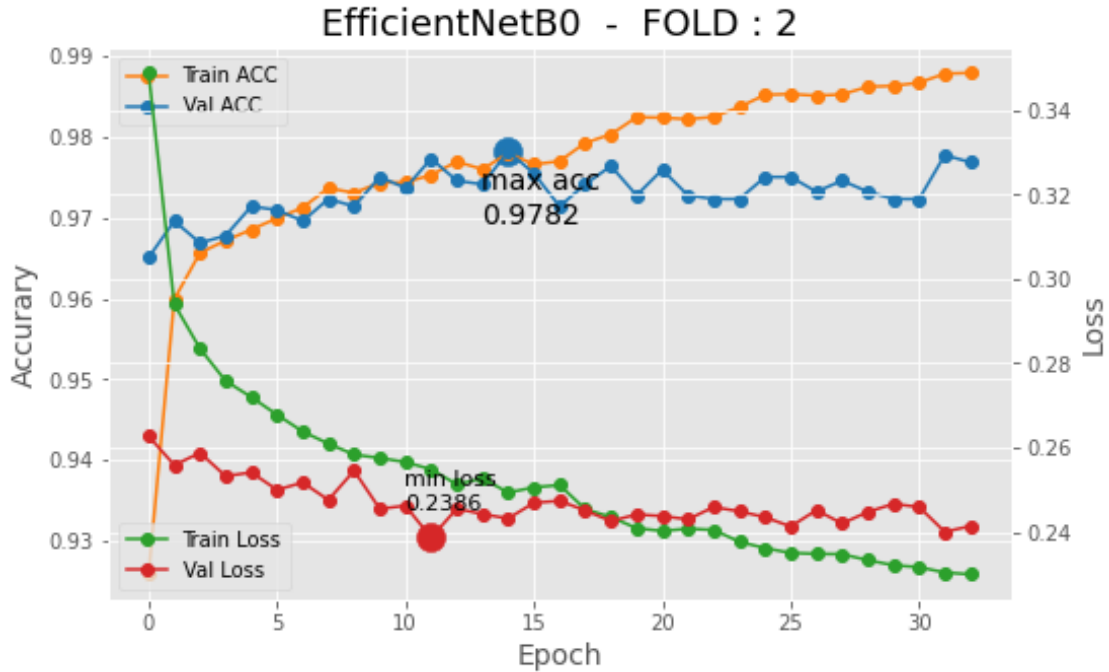

Predicting...

Accuracy 0.976871

|              | precision | recall   | f1-score | support |
|--------------|-----------|----------|----------|---------|
| Parasitized  | 0.981702  | 0.971920 | 0.976787 | 1104    |
| Uninfected   | 0.972122  | 0.981835 | 0.976954 | 1101    |
| micro avg    | 0.976871  | 0.976871 | 0.976871 | 2205    |
| macro avg    | 0.976912  | 0.976877 | 0.976870 | 2205    |
| weighted avg | 0.976919  | 0.976871 | 0.976870 | 2205    |
| samples avg  | 0.976871  | 0.976871 | 0.976871 | 2205    |

Validating...

345/344 [=====] - 80s 231ms/step



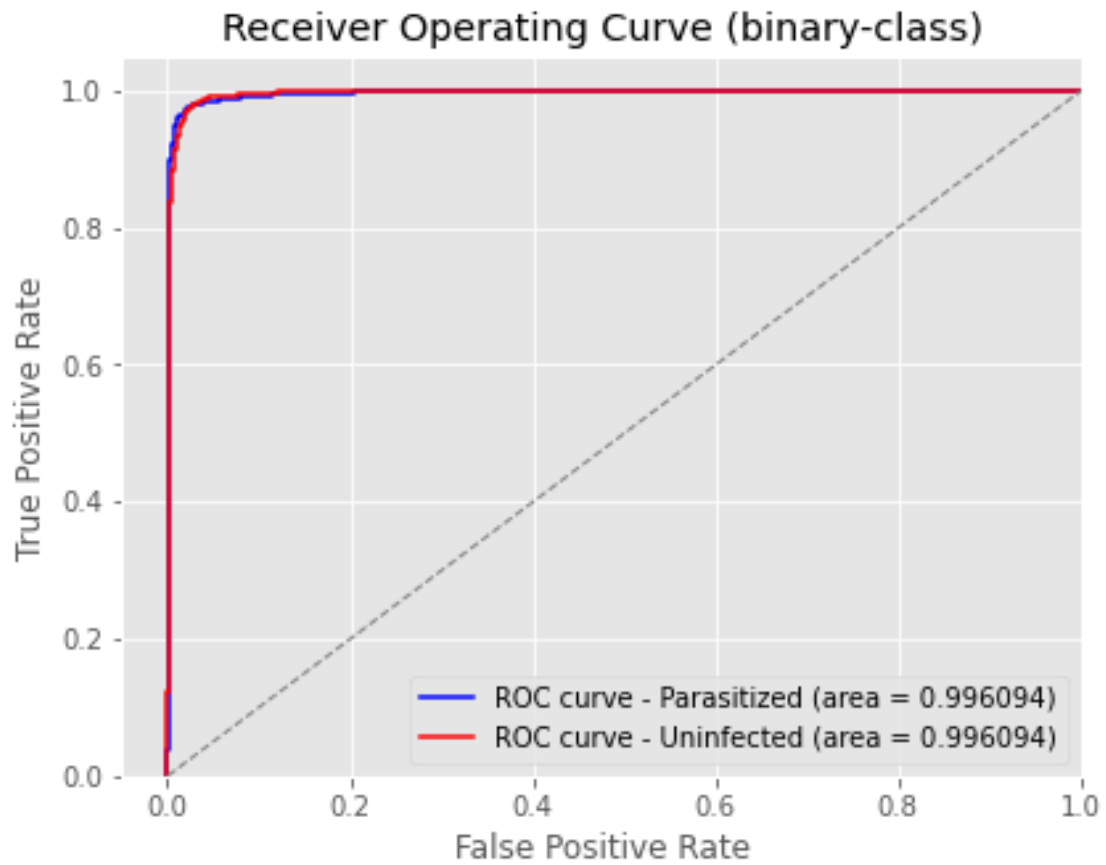

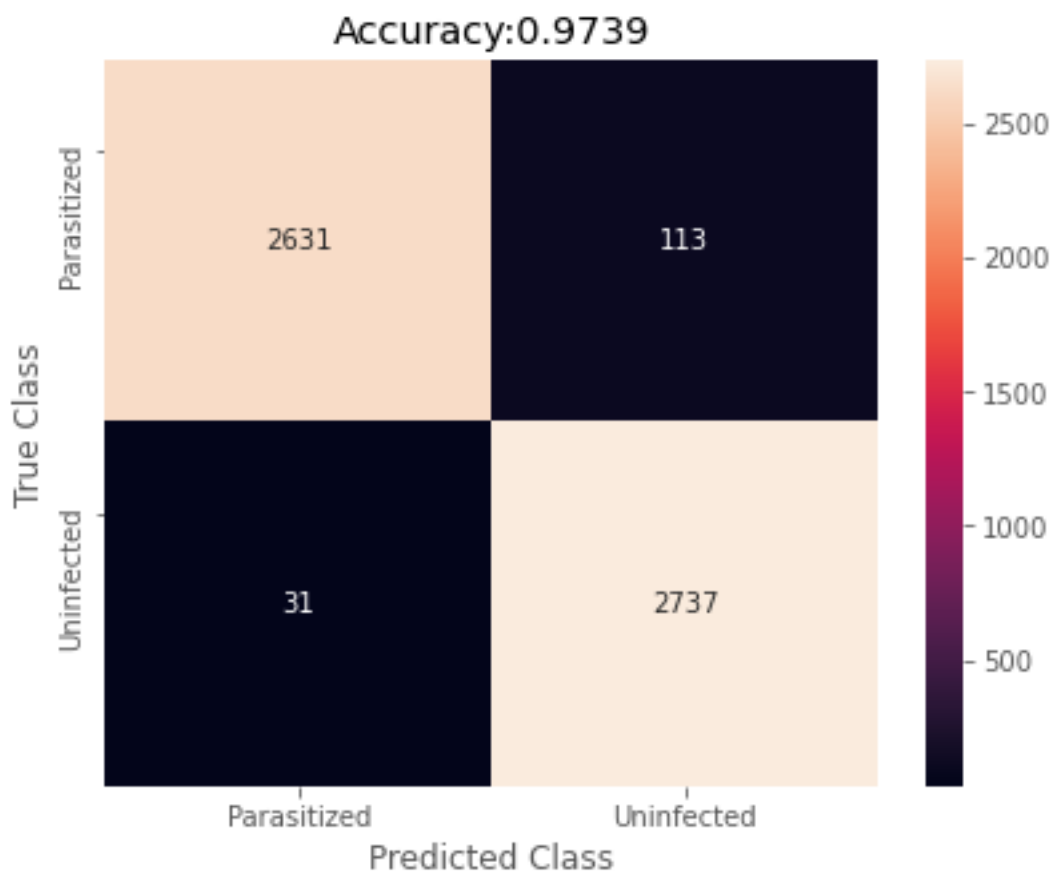

|              | precision | recall   | f1-score | support |
|--------------|-----------|----------|----------|---------|
| Parasitized  | 0.988355  | 0.958819 | 0.973363 | 2744    |
| Uninfected   | 0.960351  | 0.988801 | 0.974368 | 2768    |
| micro avg    | 0.973875  | 0.973875 | 0.973875 | 5512    |
| macro avg    | 0.974353  | 0.973810 | 0.973866 | 5512    |
| weighted avg | 0.974292  | 0.973875 | 0.973868 | 5512    |
| samples avg  | 0.973875  | 0.973875 | 0.973875 | 5512    |

End of Fold 2 - Elapsed Time: 4:38:21.031119

\*\*\*\*\*

\*\* Model: EfficientNetB0 fold: 3

Training...

Found 19841 validated image filenames.

Found 2205 validated image filenames.

Found 5512 validated image filenames.

WARNING:tensorflow:Callbacks method `on\_train\_batch\_end` is slow compared to the

batch time (batch time: 0.1017s vs `on\_train\_batch\_end` time: 0.2464s). Check your callbacks.

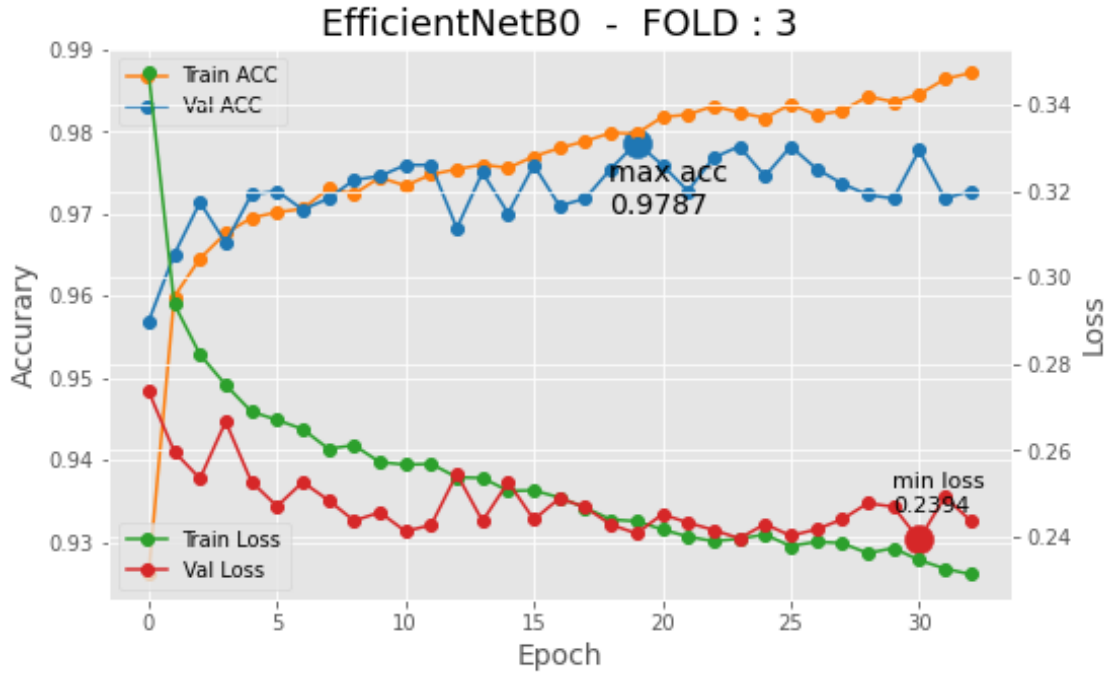

Predicting...

Accuracy 0.974603

|              | precision | recall   | f1-score | support |
|--------------|-----------|----------|----------|---------|
| Parasitized  | 0.978102  | 0.971014 | 0.974545 | 1104    |
| Uninfected   | 0.971145  | 0.978202 | 0.974661 | 1101    |
| micro avg    | 0.974603  | 0.974603 | 0.974603 | 2205    |
| macro avg    | 0.974624  | 0.974608 | 0.974603 | 2205    |
| weighted avg | 0.974628  | 0.974603 | 0.974603 | 2205    |
| samples avg  | 0.974603  | 0.974603 | 0.974603 | 2205    |

Validating...

345/344 [=====] - 79s 230ms/step

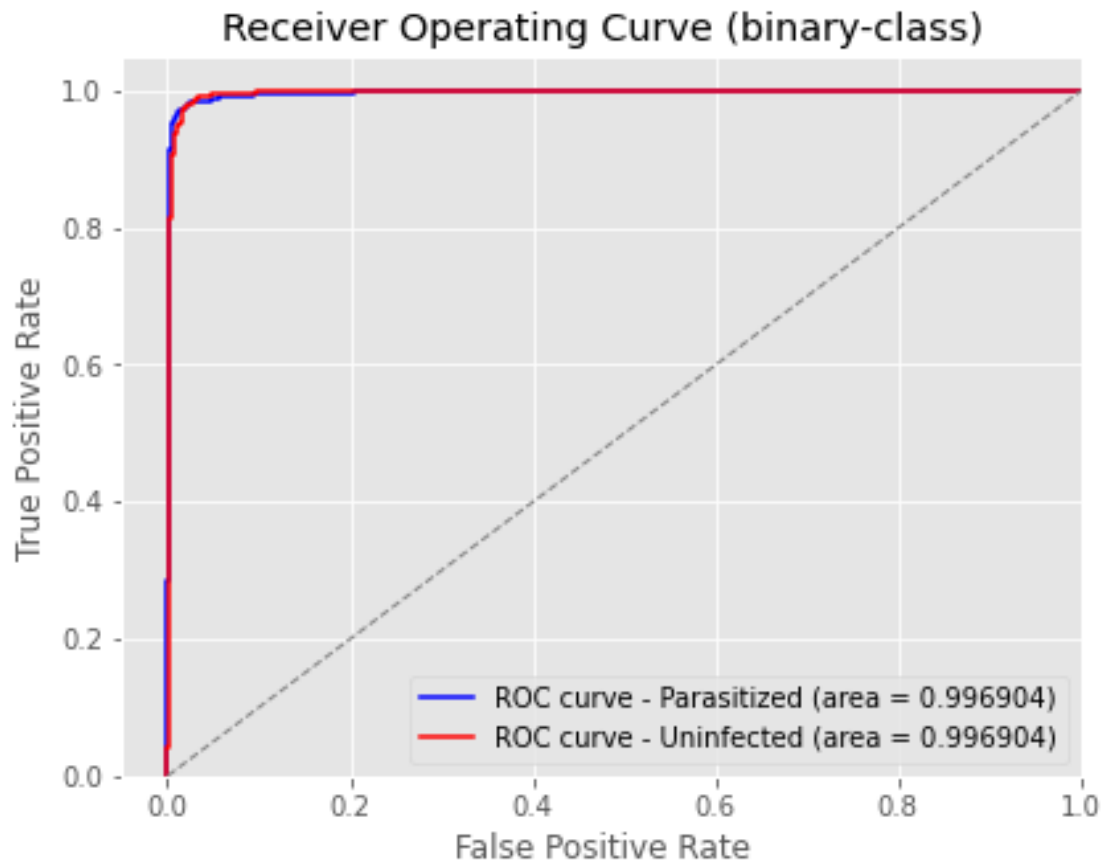

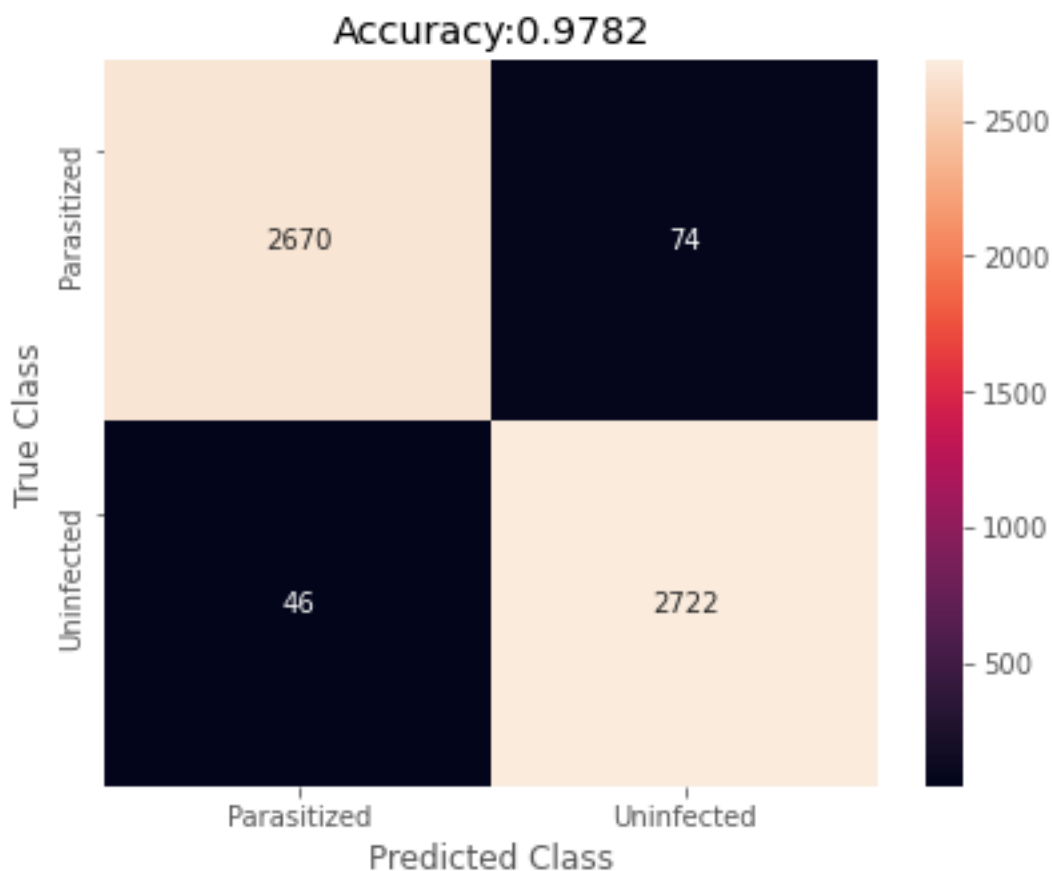

|              | precision | recall   | f1-score | support |
|--------------|-----------|----------|----------|---------|
| Parasitized  | 0.983063  | 0.973032 | 0.978022 | 2744    |
| Uninfected   | 0.973534  | 0.983382 | 0.978433 | 2768    |
| micro avg    | 0.978229  | 0.978229 | 0.978229 | 5512    |
| macro avg    | 0.978298  | 0.978207 | 0.978227 | 5512    |
| weighted avg | 0.978278  | 0.978229 | 0.978228 | 5512    |
| samples avg  | 0.978229  | 0.978229 | 0.978229 | 5512    |

End of Fold 3 - Elapsed Time: 4:35:22.530893

\*\*\*\*\*

\*\* Model: EfficientNetB0 fold: 4

Training...

Found 19841 validated image filenames.

Found 2205 validated image filenames.

Found 5512 validated image filenames.

WARNING:tensorflow:Callbacks method `on\_train\_batch\_end` is slow compared to the

batch time (batch time: 0.1007s vs `on\_train\_batch\_end` time: 0.2443s). Check your callbacks.

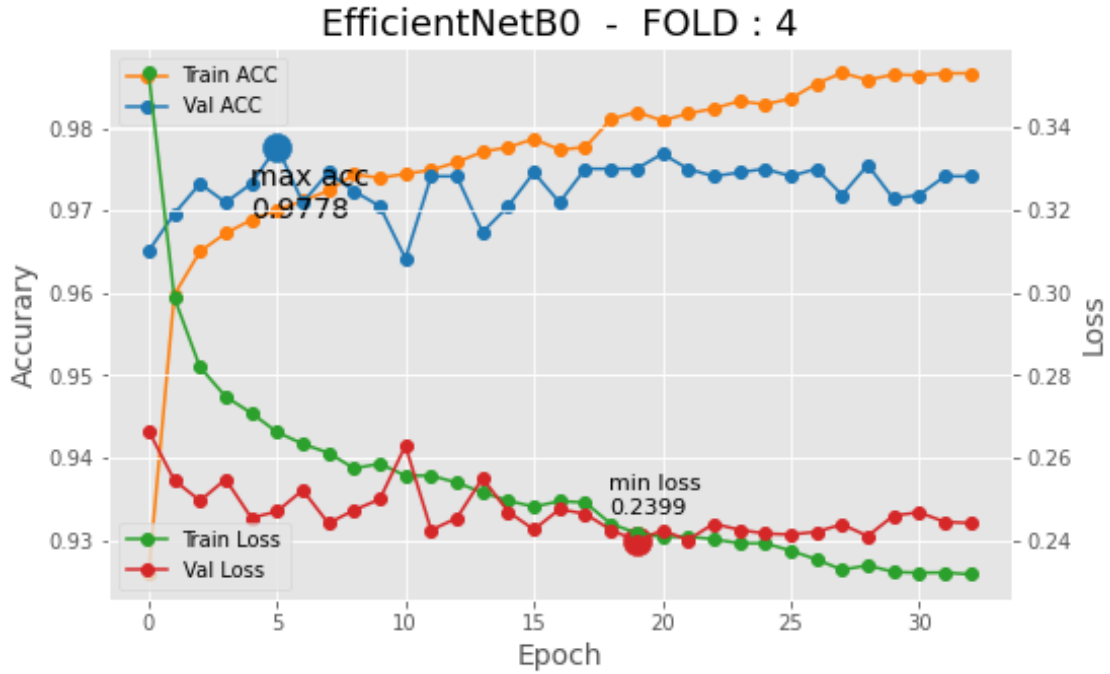

Predicting...

Accuracy 0.973243

|              | precision | recall   | f1-score | support |
|--------------|-----------|----------|----------|---------|
| Parasitized  | 0.978042  | 0.968297 | 0.973145 | 1104    |
| Uninfected   | 0.968525  | 0.978202 | 0.973339 | 1101    |
| micro avg    | 0.973243  | 0.973243 | 0.973243 | 2205    |
| macro avg    | 0.973284  | 0.973249 | 0.973242 | 2205    |
| weighted avg | 0.973290  | 0.973243 | 0.973242 | 2205    |
| samples avg  | 0.973243  | 0.973243 | 0.973243 | 2205    |

Validating...

345/344 [=====] - 78s 227ms/step

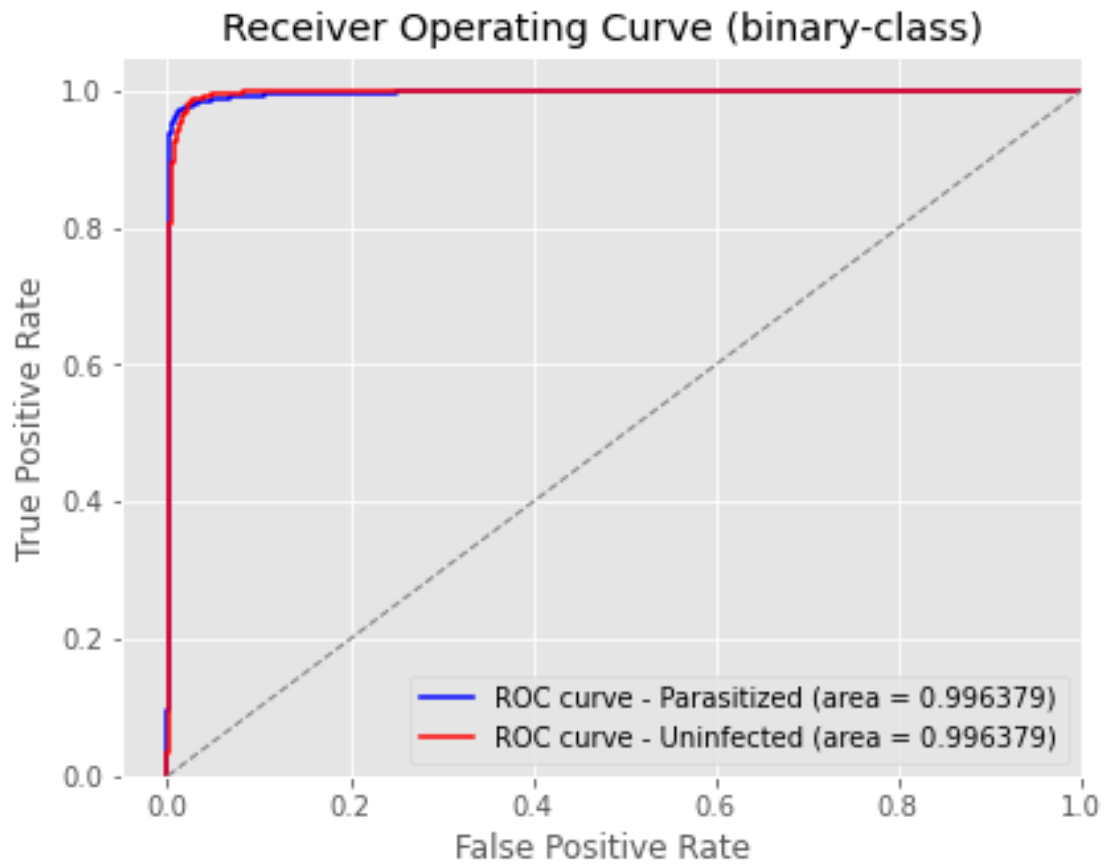

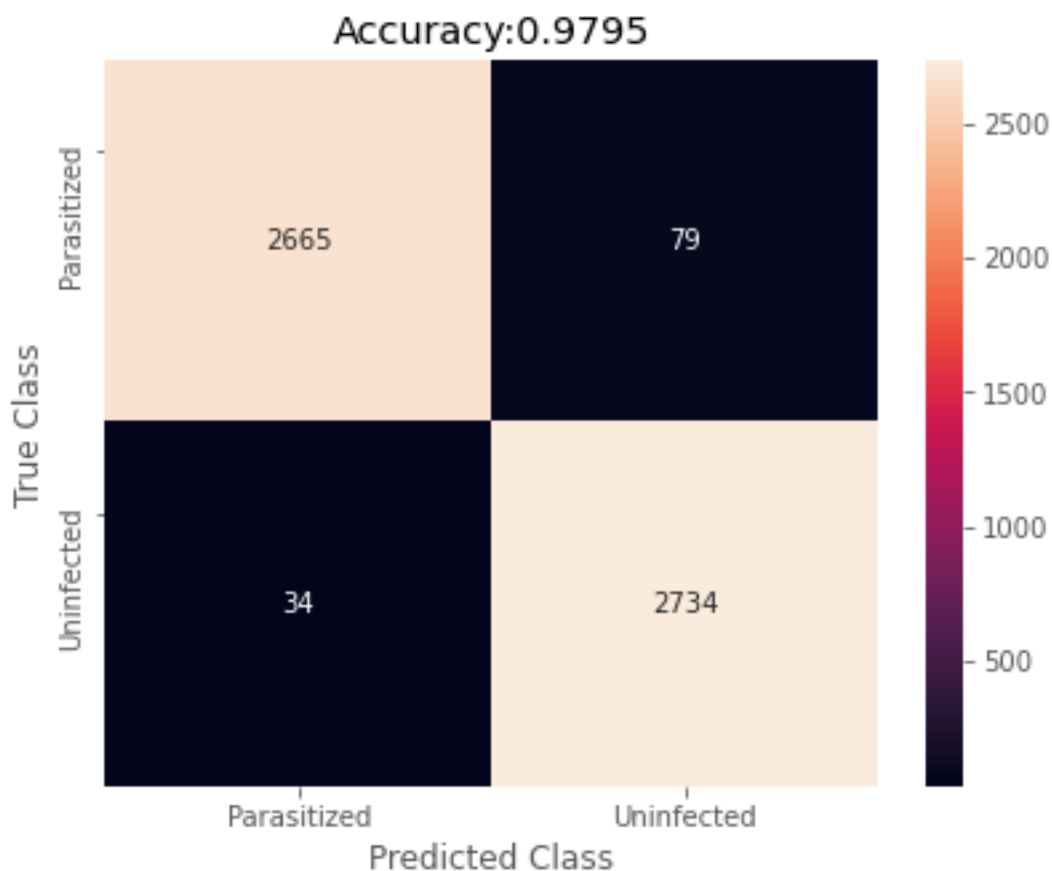

|              | precision | recall   | f1-score | support |
|--------------|-----------|----------|----------|---------|
| Parasitized  | 0.987403  | 0.971210 | 0.979239 | 2744    |
| Uninfected   | 0.971916  | 0.987717 | 0.979753 | 2768    |
| micro avg    | 0.979499  | 0.979499 | 0.979499 | 5512    |
| macro avg    | 0.979659  | 0.979463 | 0.979496 | 5512    |
| weighted avg | 0.979626  | 0.979499 | 0.979497 | 5512    |
| samples avg  | 0.979499  | 0.979499 | 0.979499 | 5512    |

End of Fold 4 - Elapsed Time: 4:40:23.665173

\*\*\*\*\*

\*\* Model: EfficientNetB0 fold: 5

Training...

Found 19841 validated image filenames.

Found 2205 validated image filenames.

Found 5512 validated image filenames.

WARNING:tensorflow:Callbacks method `on\_train\_batch\_end` is slow compared to the



batch time (batch time: 0.1466s vs `on\_train\_batch\_end` time: 0.2433s). Check your callbacks.

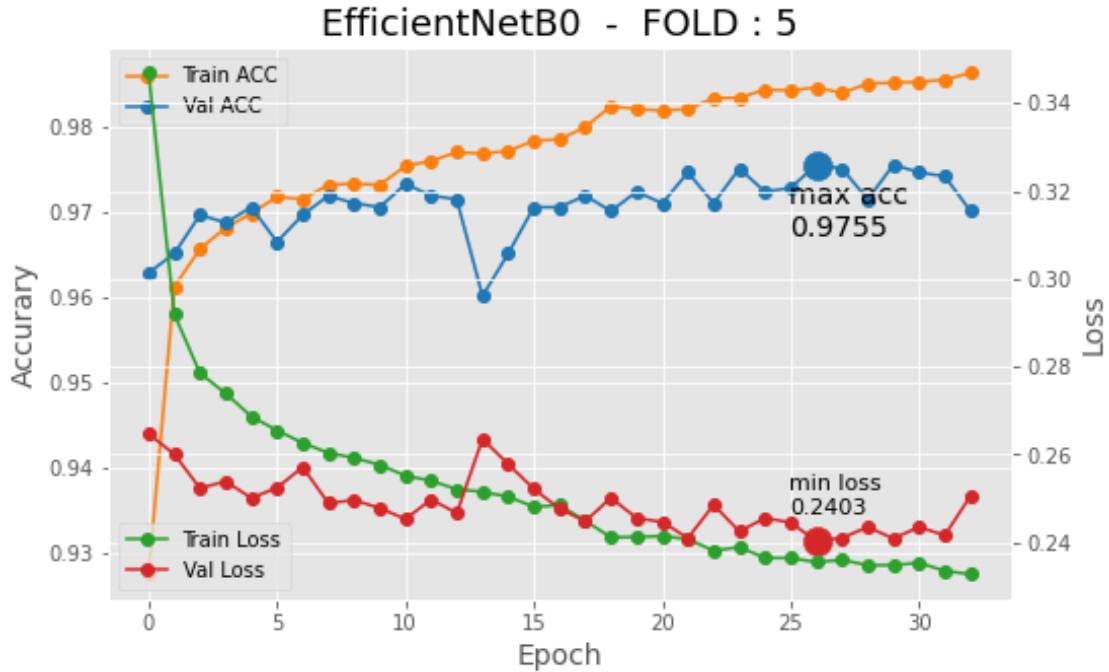

Predicting...

Accuracy 0.974150

|              | precision | recall   | f1-score | support |
|--------------|-----------|----------|----------|---------|
| Parasitized  | 0.984259  | 0.963735 | 0.973889 | 1103    |
| Uninfected   | 0.964444  | 0.984574 | 0.974405 | 1102    |
| micro avg    | 0.974150  | 0.974150 | 0.974150 | 2205    |
| macro avg    | 0.974352  | 0.974154 | 0.974147 | 2205    |
| weighted avg | 0.974356  | 0.974150 | 0.974147 | 2205    |
| samples avg  | 0.974150  | 0.974150 | 0.974150 | 2205    |

Validating...

345/344 [=====] - 81s 236ms/step

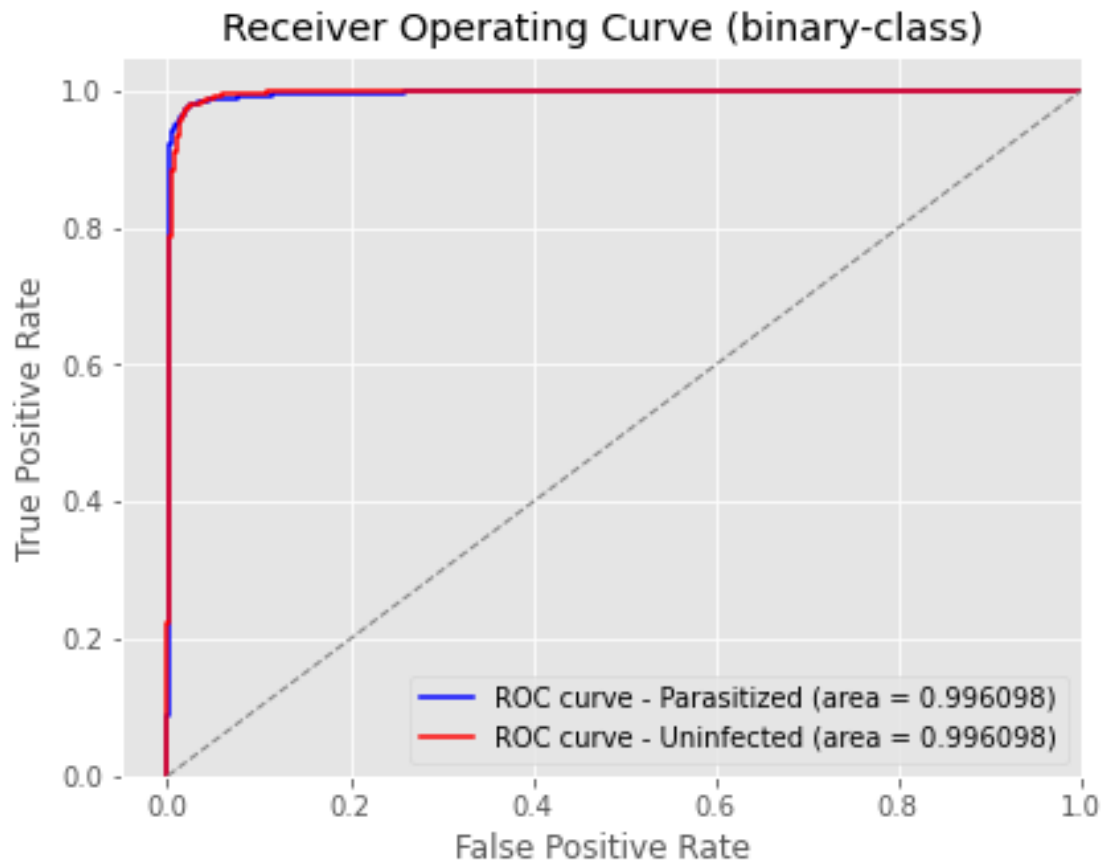

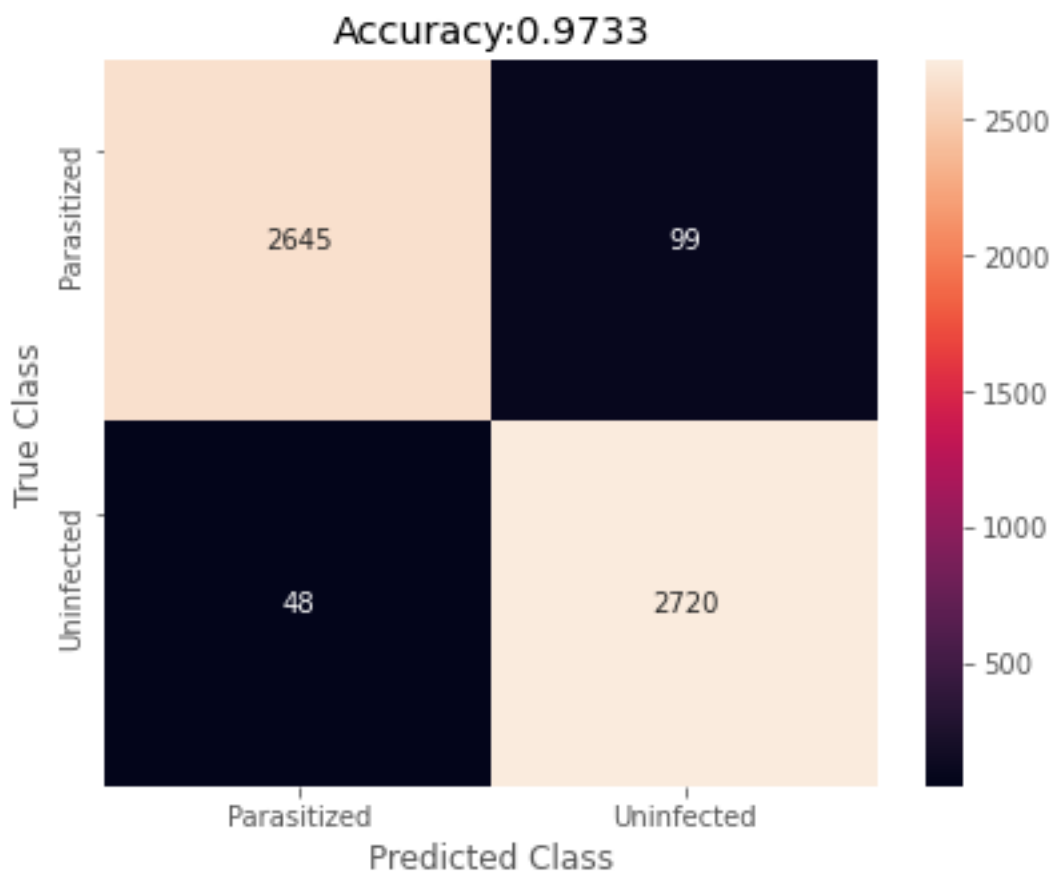

|              | precision | recall   | f1-score | support |
|--------------|-----------|----------|----------|---------|
| Parasitized  | 0.982176  | 0.963921 | 0.972963 | 2744    |
| Uninfected   | 0.964881  | 0.982659 | 0.973689 | 2768    |
| micro avg    | 0.973331  | 0.973331 | 0.973331 | 5512    |
| macro avg    | 0.973529  | 0.973290 | 0.973326 | 5512    |
| weighted avg | 0.973491  | 0.973331 | 0.973328 | 5512    |
| samples avg  | 0.973331  | 0.973331 | 0.973331 | 5512    |

End of Fold 5 - Elapsed Time: 4:46:31.801410

\*\*\*\*\*

\*\* Model: EfficientNetB0 fold: 6

Training...

Found 19842 validated image filenames.

Found 2204 validated image filenames.

Found 5512 validated image filenames.

WARNING:tensorflow:Callbacks method `on\_train\_batch\_end` is slow compared to the

batch time (batch time: 0.0988s vs `on\_train\_batch\_end` time: 0.2463s). Check your callbacks.

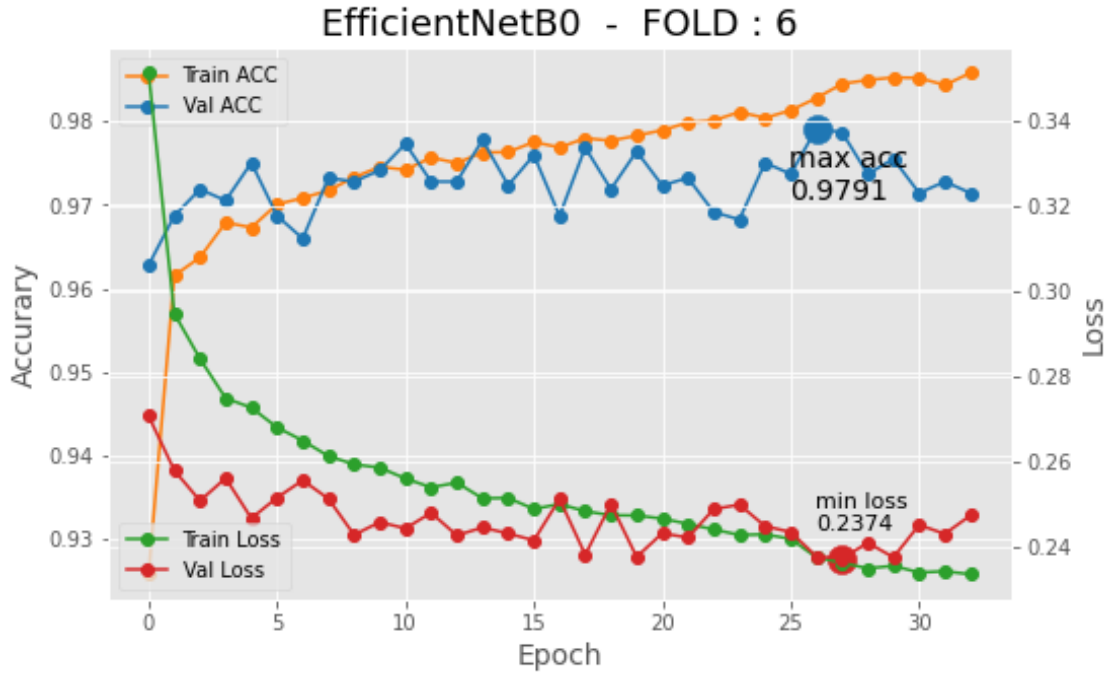

Predicting...

Accuracy 0.976407

|              | precision | recall   | f1-score | support |
|--------------|-----------|----------|----------|---------|
| Parasitized  | 0.979909  | 0.972801 | 0.976342 | 1103    |
| Uninfected   | 0.972949  | 0.980018 | 0.976471 | 1101    |
| micro avg    | 0.976407  | 0.976407 | 0.976407 | 2204    |
| macro avg    | 0.976429  | 0.976410 | 0.976406 | 2204    |
| weighted avg | 0.976432  | 0.976407 | 0.976406 | 2204    |
| samples avg  | 0.976407  | 0.976407 | 0.976407 | 2204    |

Validating...

345/344 [=====] - 79s 230ms/step

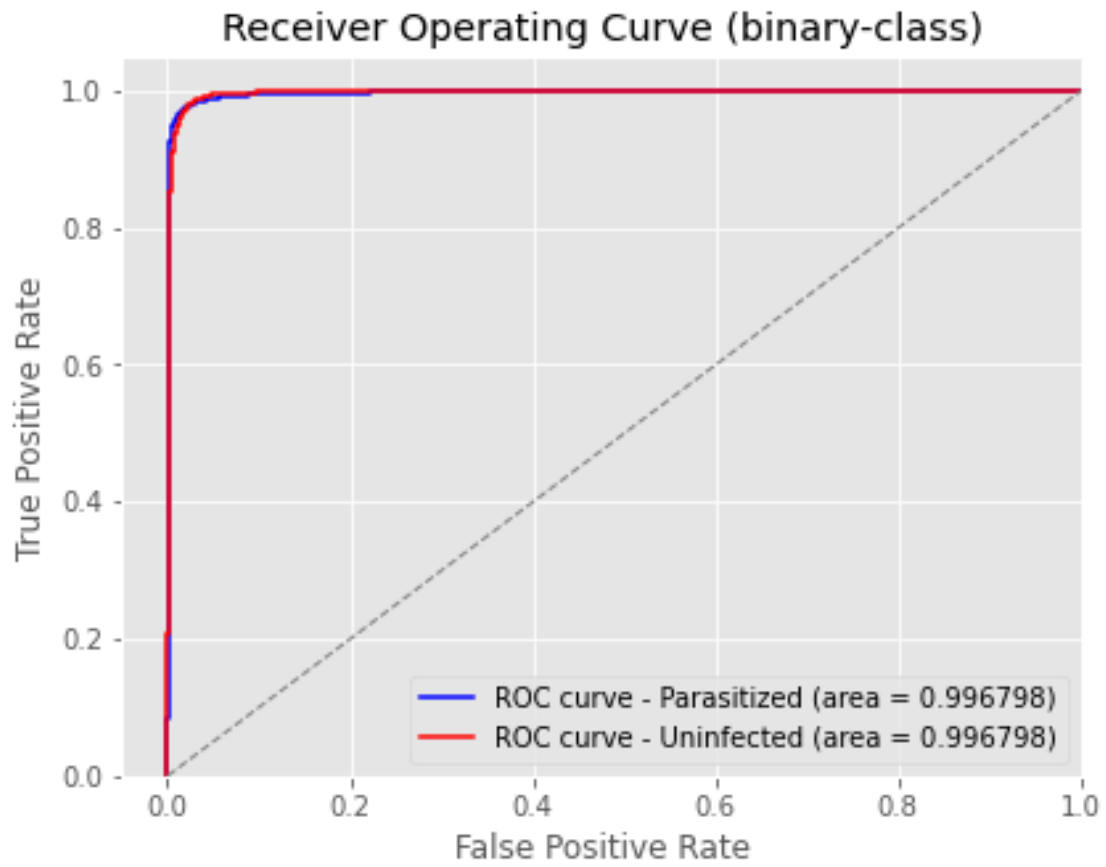

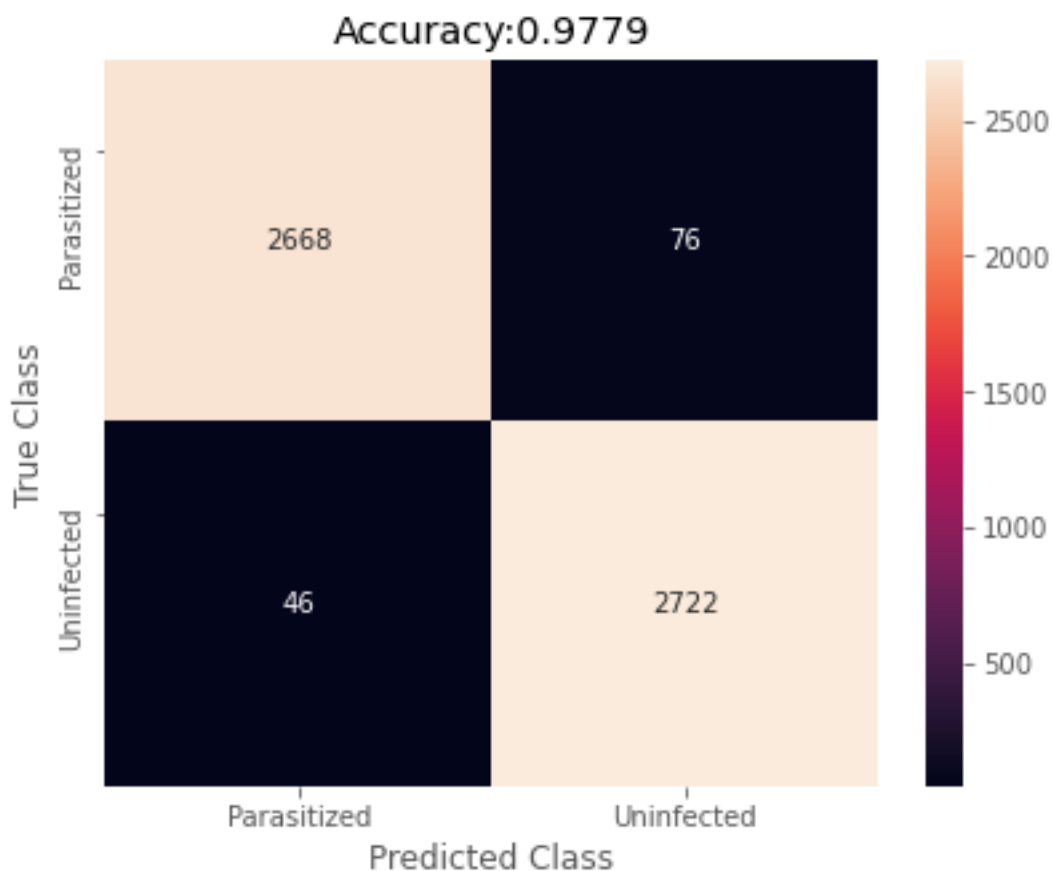

|              | precision | recall   | f1-score | support |
|--------------|-----------|----------|----------|---------|
| Parasitized  | 0.983051  | 0.972303 | 0.977647 | 2744    |
| Uninfected   | 0.972838  | 0.983382 | 0.978081 | 2768    |
| micro avg    | 0.977866  | 0.977866 | 0.977866 | 5512    |
| macro avg    | 0.977944  | 0.977842 | 0.977864 | 5512    |
| weighted avg | 0.977922  | 0.977866 | 0.977865 | 5512    |
| samples avg  | 0.977866  | 0.977866 | 0.977866 | 5512    |

End of Fold 6 - Elapsed Time: 4:46:42.534757

\*\*\*\*\*

\*\* Model: EfficientNetB0 fold: 7

Training...

Found 19842 validated image filenames.

Found 2204 validated image filenames.

Found 5512 validated image filenames.

WARNING:tensorflow:Callbacks method `on\_train\_batch\_end` is slow compared to the

batch time (batch time: 0.1037s vs `on\_train\_batch\_end` time: 0.2443s). Check your callbacks.

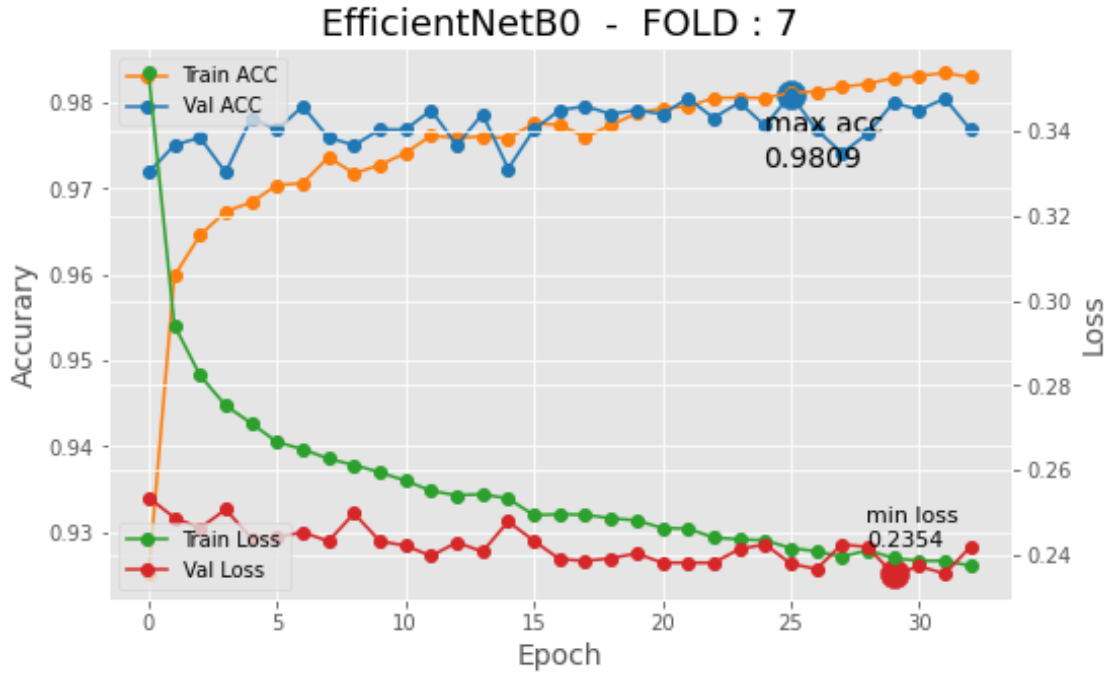

Predicting...

Accuracy 0.983666

|              | precision | recall   | f1-score | support |
|--------------|-----------|----------|----------|---------|
| Parasitized  | 0.985441  | 0.981868 | 0.983651 | 1103    |
| Uninfected   | 0.981900  | 0.985468 | 0.983681 | 1101    |
| micro avg    | 0.983666  | 0.983666 | 0.983666 | 2204    |
| macro avg    | 0.983671  | 0.983668 | 0.983666 | 2204    |
| weighted avg | 0.983672  | 0.983666 | 0.983666 | 2204    |
| samples avg  | 0.983666  | 0.983666 | 0.983666 | 2204    |

Validating...

345/344 [=====] - 78s 228ms/step

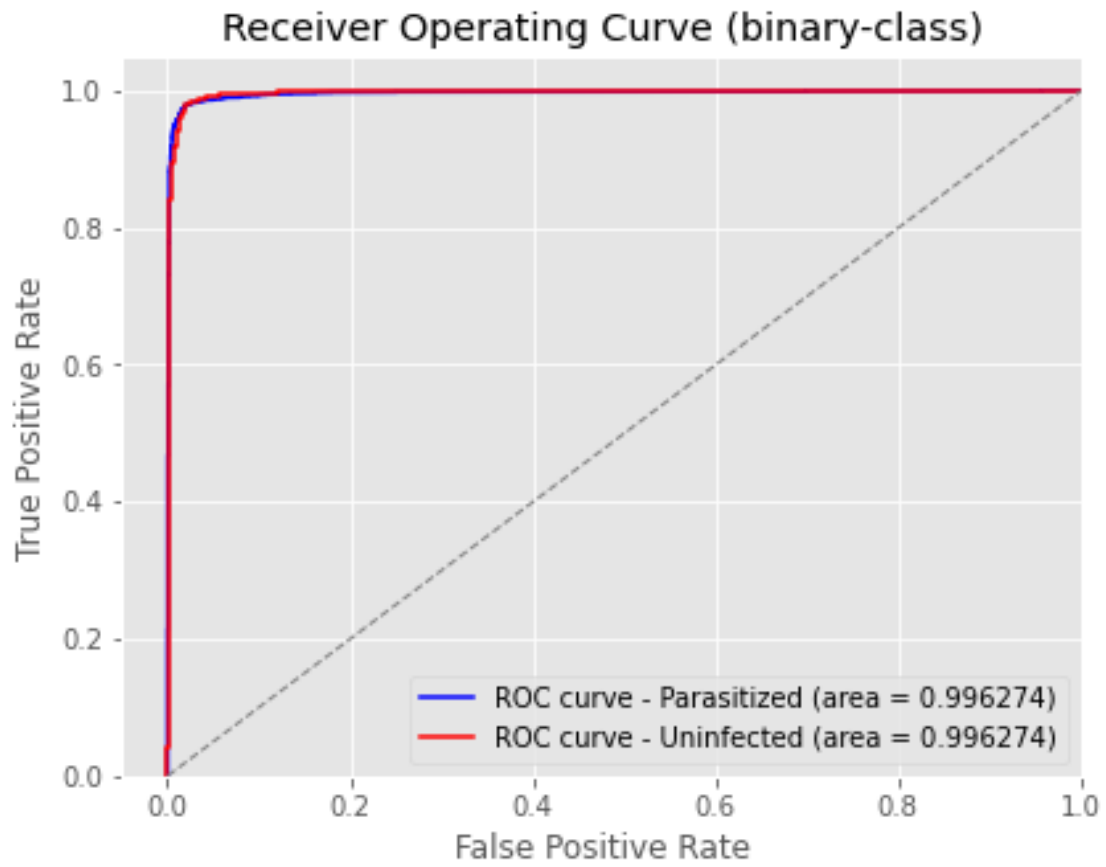



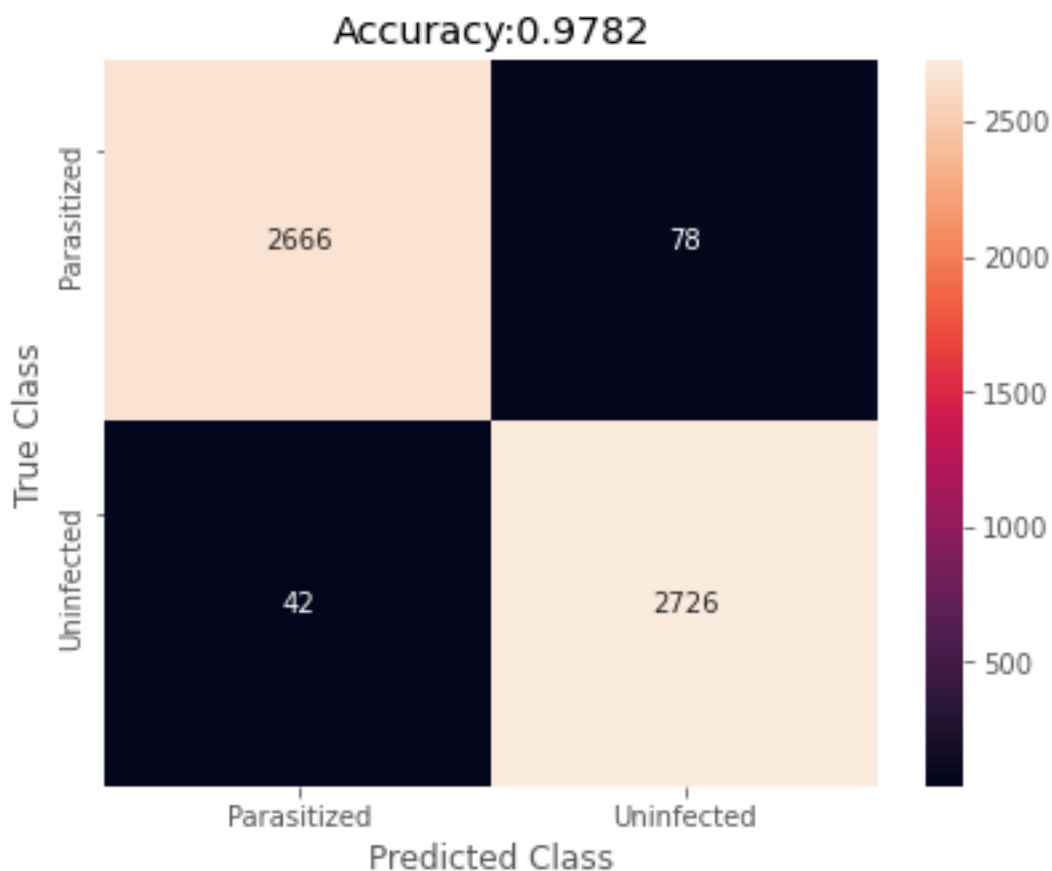

|              | precision | recall   | f1-score | support |
|--------------|-----------|----------|----------|---------|
| Parasitized  | 0.984490  | 0.971574 | 0.977990 | 2744    |
| Uninfected   | 0.972183  | 0.984827 | 0.978464 | 2768    |
| micro avg    | 0.978229  | 0.978229 | 0.978229 | 5512    |
| macro avg    | 0.978336  | 0.978200 | 0.978227 | 5512    |
| weighted avg | 0.978310  | 0.978229 | 0.978228 | 5512    |
| samples avg  | 0.978229  | 0.978229 | 0.978229 | 5512    |

End of Fold 7 - Elapsed Time: 4:43:31.059613

\*\*\*\*\*

\*\* Model: EfficientNetB0 fold: 8

Training...

Found 19842 validated image filenames.

Found 2204 validated image filenames.

Found 5512 validated image filenames.

WARNING:tensorflow:Callbacks method `on\_train\_batch\_end` is slow compared to the

batch time (batch time: 0.0998s vs `on\_train\_batch\_end` time: 0.2533s). Check your callbacks.

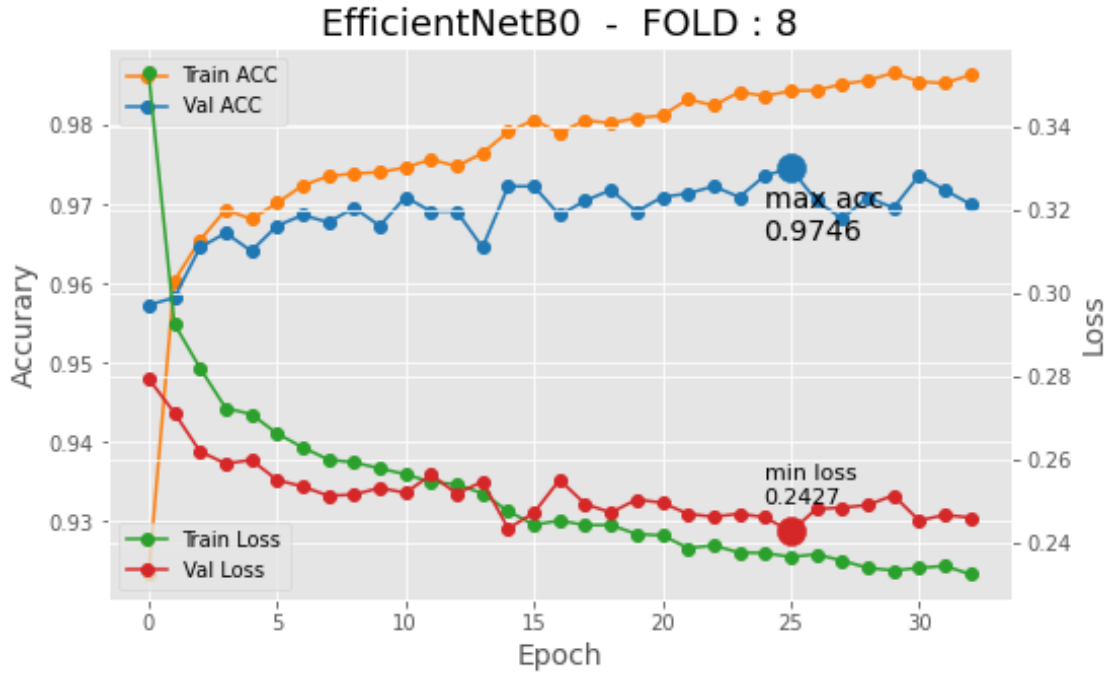

Predicting...

Accuracy 0.970508

|              | precision | recall   | f1-score | support |
|--------------|-----------|----------|----------|---------|
| Parasitized  | 0.978782  | 0.961922 | 0.970279 | 1103    |
| Uninfected   | 0.962500  | 0.979110 | 0.970734 | 1101    |
| micro avg    | 0.970508  | 0.970508 | 0.970508 | 2204    |
| macro avg    | 0.970641  | 0.970516 | 0.970506 | 2204    |
| weighted avg | 0.970649  | 0.970508 | 0.970506 | 2204    |
| samples avg  | 0.970508  | 0.970508 | 0.970508 | 2204    |

Validating...

345/344 [=====] - 84s 242ms/step

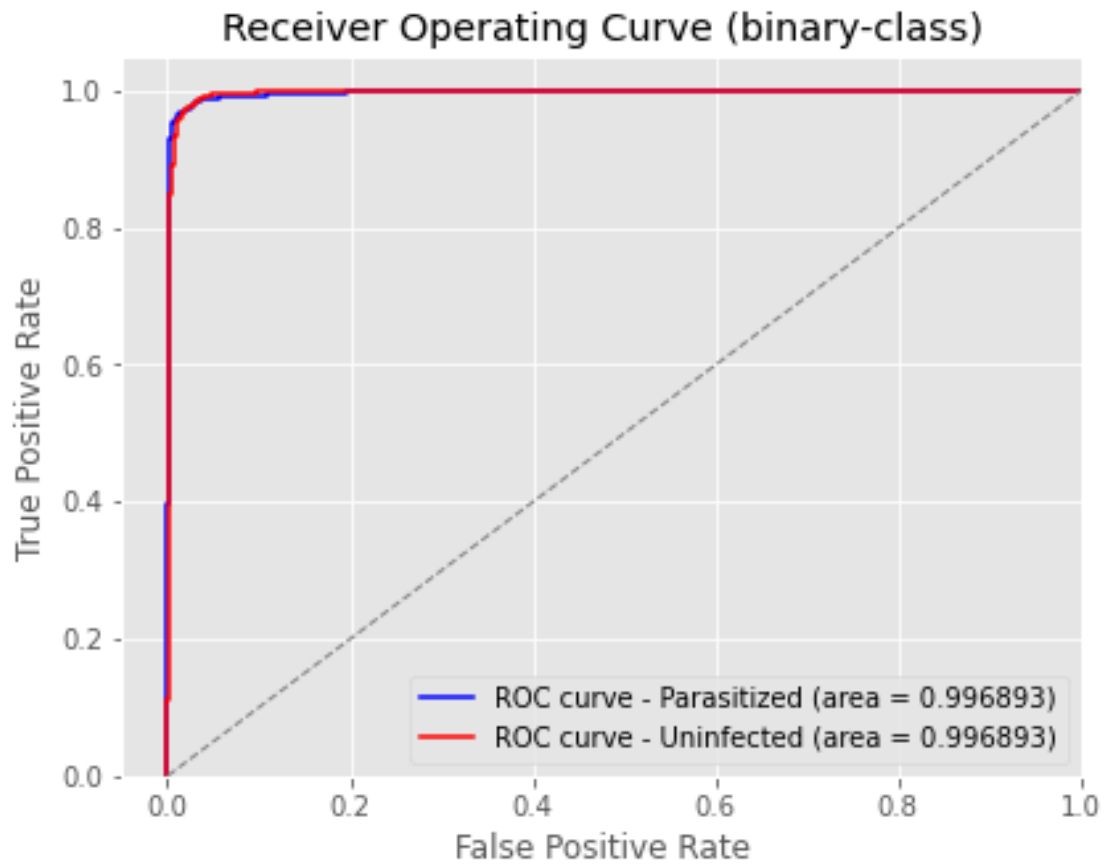

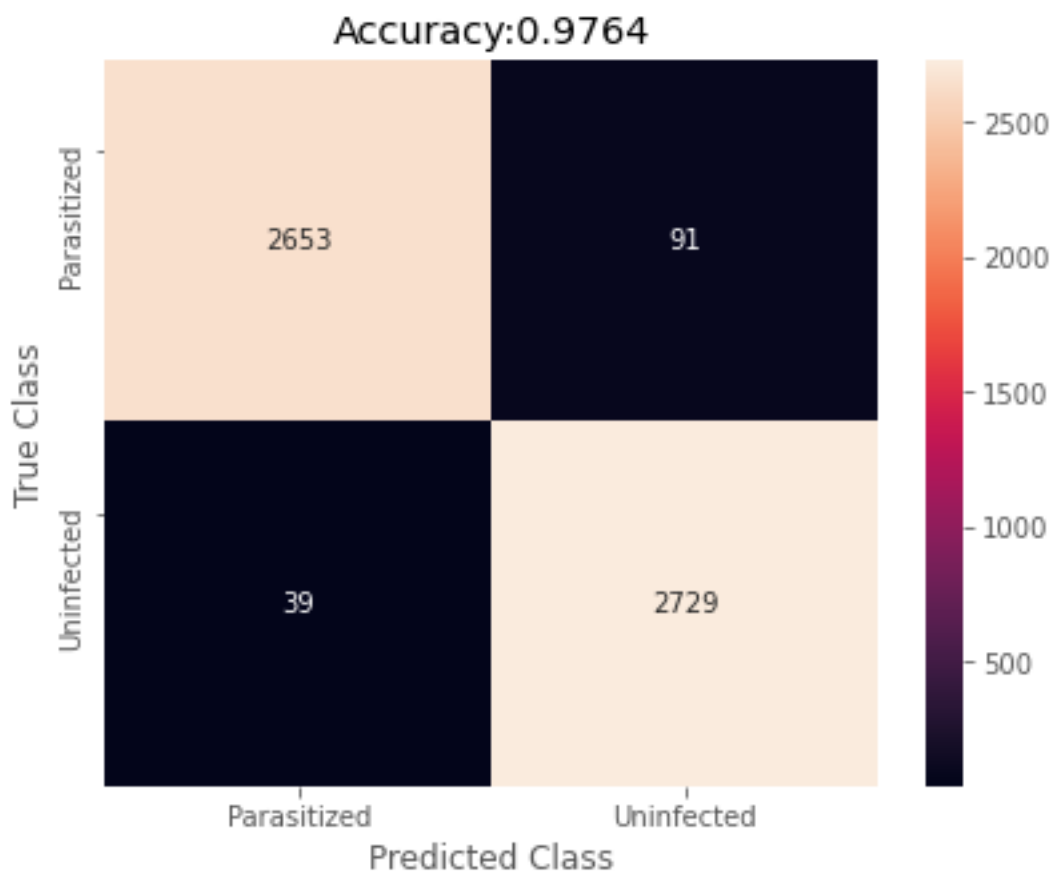

|              | precision | recall   | f1-score | support |
|--------------|-----------|----------|----------|---------|
| Parasitized  | 0.985513  | 0.966837 | 0.976085 | 2744    |
| Uninfected   | 0.967730  | 0.985910 | 0.976736 | 2768    |
| micro avg    | 0.976415  | 0.976415 | 0.976415 | 5512    |
| macro avg    | 0.976622  | 0.976374 | 0.976411 | 5512    |
| weighted avg | 0.976583  | 0.976415 | 0.976412 | 5512    |
| samples avg  | 0.976415  | 0.976415 | 0.976415 | 5512    |

End of Fold 8 - Elapsed Time: 4:48:50.469830

\*\*\*\*\*

\*\* Model: EfficientNetB0 fold: 9

Training...

Found 19842 validated image filenames.

Found 2204 validated image filenames.

Found 5512 validated image filenames.

### EfficientNetB0 - FOLD : 9

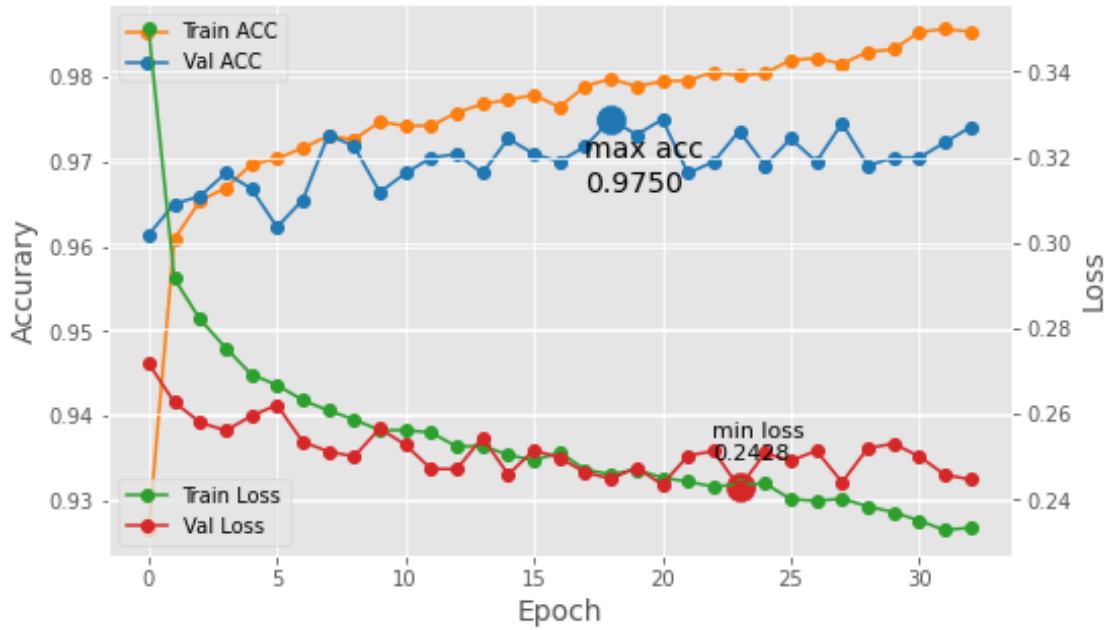

Predicting...

Accuracy 0.975045

|              | precision | recall   | f1-score | support |
|--------------|-----------|----------|----------|---------|
| Parasitized  | 0.985185  | 0.964642 | 0.974805 | 1103    |
| Uninfected   | 0.965302  | 0.985468 | 0.975281 | 1101    |
| micro avg    | 0.975045  | 0.975045 | 0.975045 | 2204    |
| macro avg    | 0.975244  | 0.975055 | 0.975043 | 2204    |
| weighted avg | 0.975253  | 0.975045 | 0.975043 | 2204    |
| samples avg  | 0.975045  | 0.975045 | 0.975045 | 2204    |

Validating...

345/344 [=====] - 86s 250ms/step

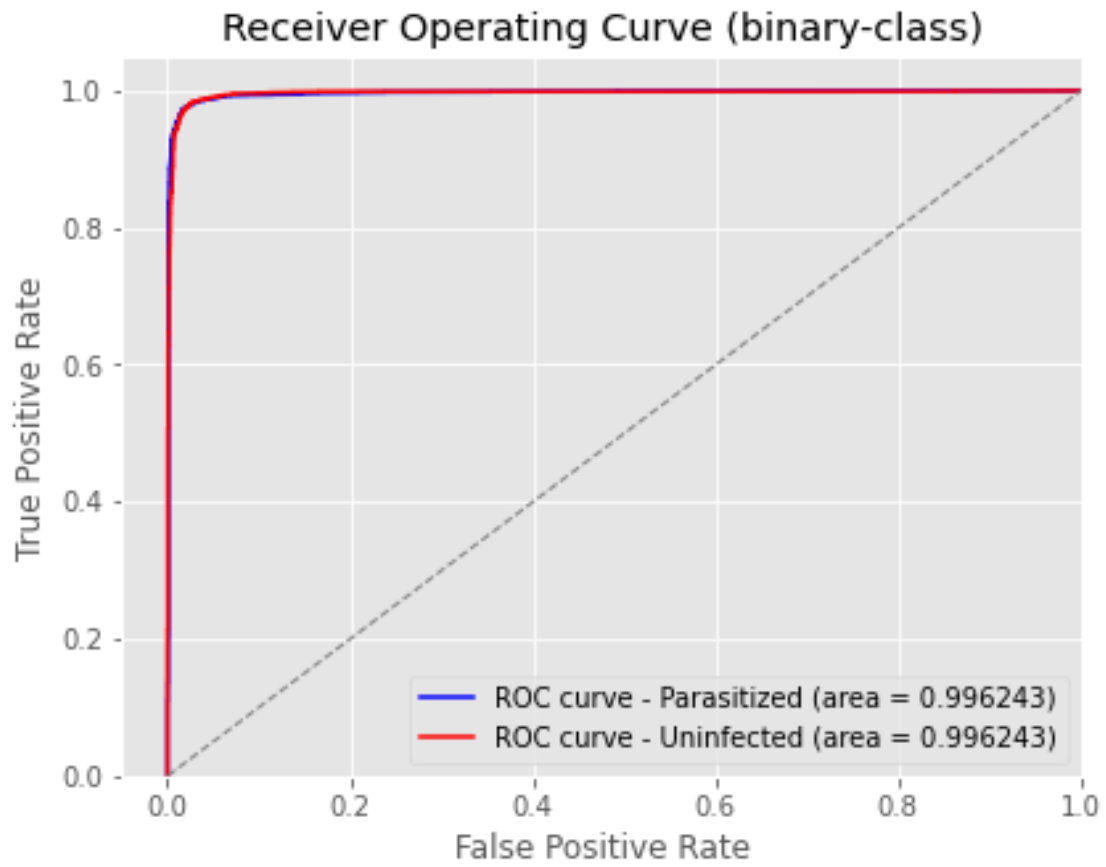

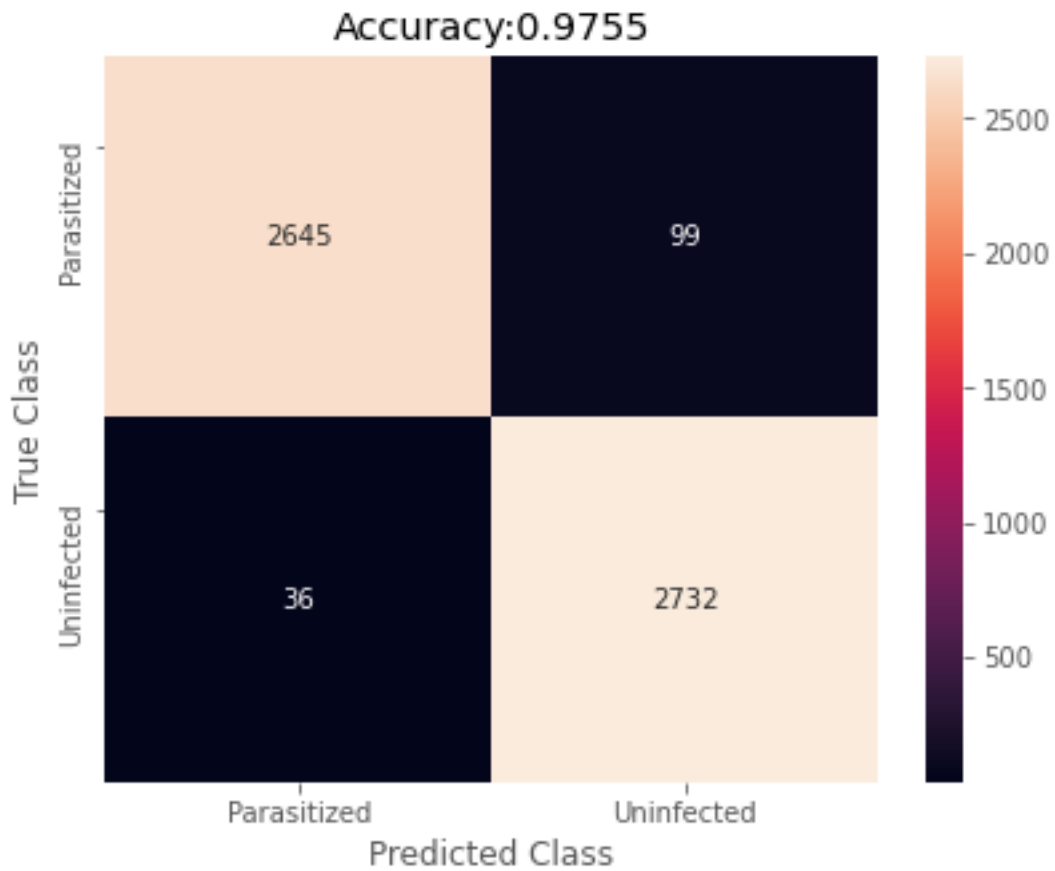

|              | precision | recall   | f1-score | support |
|--------------|-----------|----------|----------|---------|
| Parasitized  | 0.986572  | 0.963921 | 0.975115 | 2744    |
| Uninfected   | 0.965030  | 0.986994 | 0.975889 | 2768    |
| micro avg    | 0.975508  | 0.975508 | 0.975508 | 5512    |
| macro avg    | 0.975801  | 0.975458 | 0.975502 | 5512    |
| weighted avg | 0.975754  | 0.975508 | 0.975504 | 5512    |
| samples avg  | 0.975508  | 0.975508 | 0.975508 | 5512    |

End of Fold 9 - Elapsed Time: 4:58:10.694449

Validate ensembled results...

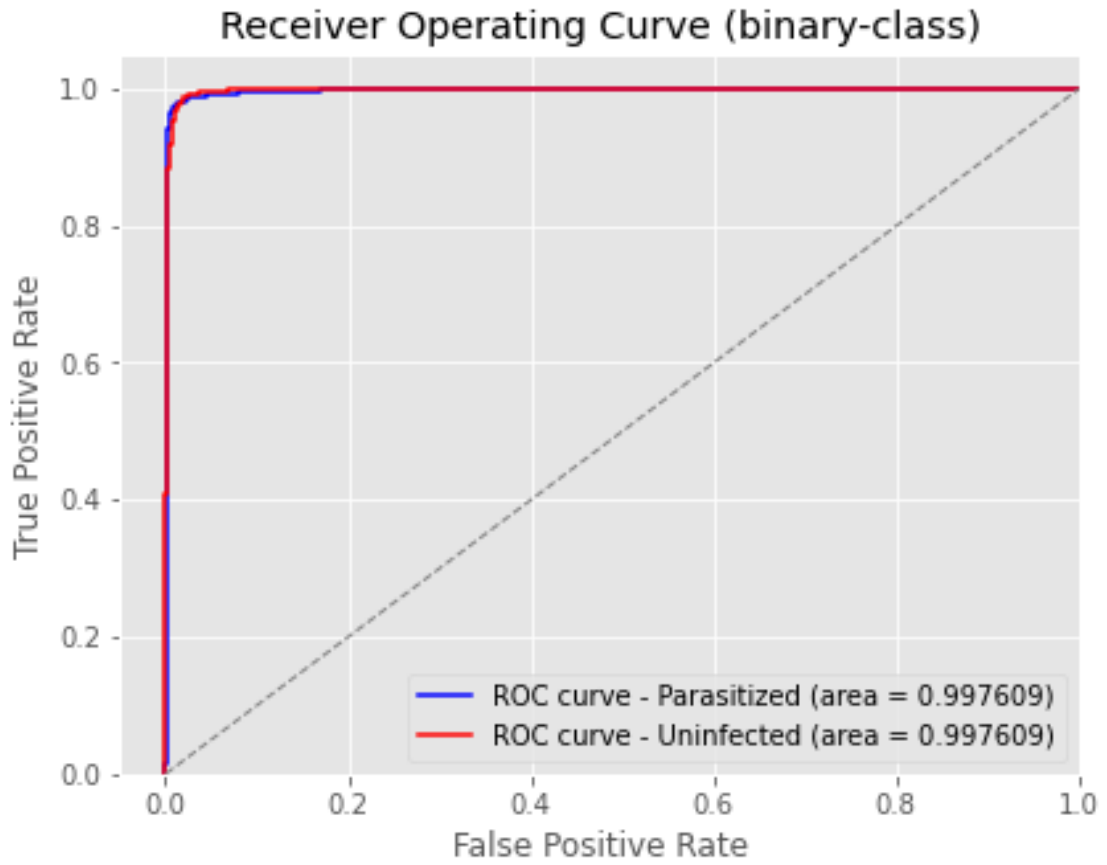

Accuracy 0.982946



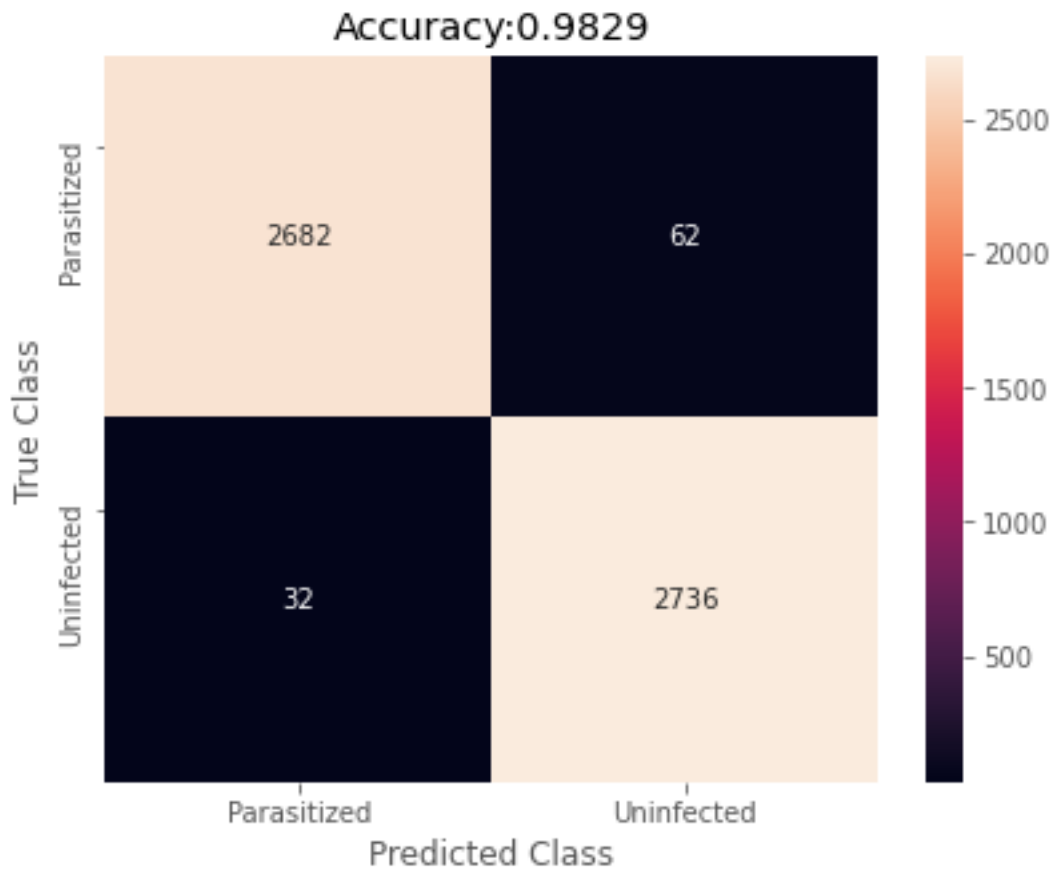

f1 score: 0.982945

|              | precision | recall   | f1-score | support |
|--------------|-----------|----------|----------|---------|
| Parasitized  | 0.988209  | 0.977405 | 0.982778 | 2744    |
| Uninfected   | 0.977841  | 0.988439 | 0.983112 | 2768    |
| micro avg    | 0.982946  | 0.982946 | 0.982946 | 5512    |
| macro avg    | 0.983025  | 0.982922 | 0.982945 | 5512    |
| weighted avg | 0.983003  | 0.982946 | 0.982945 | 5512    |
| samples avg  | 0.982946  | 0.982946 | 0.982946 | 5512    |

END Model EfficientNetB0 - Elapsed Time: 1 day, 23:38:44.175101

## 2.5 Examine / Summarize Errors

Plot a sample of failed prediction. Both types:

- Real: Parasitized -> Predicted: Uninfected

- Real: Uninfected -> Predicted: Parasitized

```
[ ]: import random
import matplotlib.pyplot as plt

M = 3          # Minimum number of images to see of each error type

N = len(TIPOS)
for i in range(N):          # i: class number for y_true
    for j in range(N):      # j: class number for y_pred
        if i==j:           # Only errors
            continue
        indices = (val_true.values[:,i]==1) & (decision[:,j]==1)
        errores = sum(indices)
        if (errores < M):
            continue

        images = random.sample(list(df_val['file'][indices]), M)
        print('Real: {0} -> Predicted: {1}      NUM. ERRORS: {2}' \
              .format(TIPOS[i], TIPOS[j], errores))
        plt.figure(figsize=(10,10))
        for k in range(M):
            plt.subplot(1, M, k+1)
            img = plt.imread(DESTDIR+images[k])
            plt.imshow(img)
            plt.axis('off')
        plt.tight_layout()
        plt.show()
```

Real: Parasitized -> Predicted: Uninfected NUM. ERRORS: 62

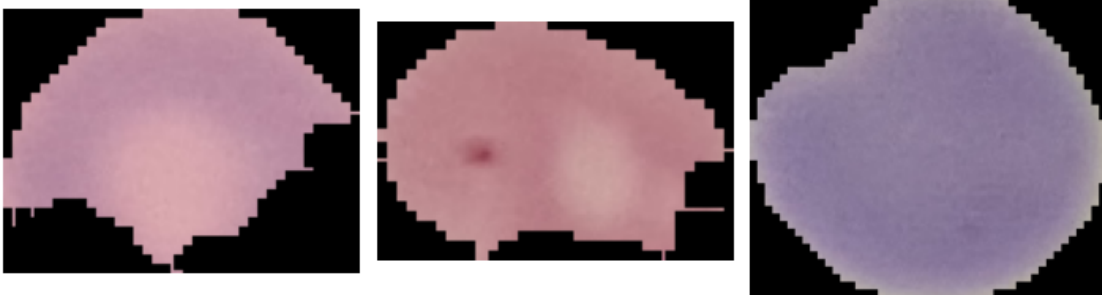

Real: Uninfected -> Predicted: Parasitized NUM. ERRORS: 32

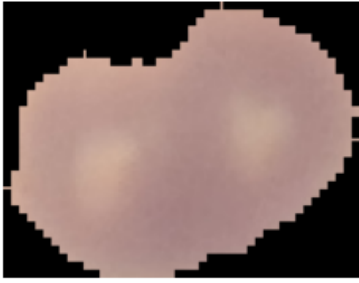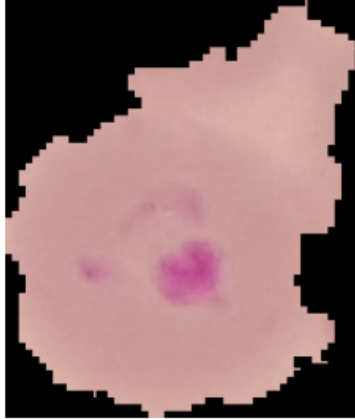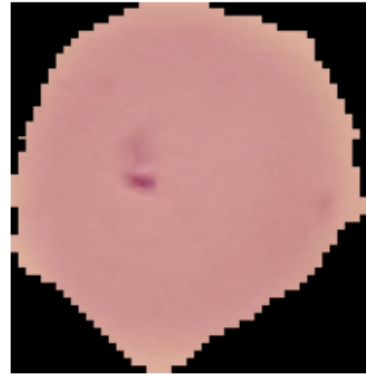

Supplement: 11042_2022_12624_MOESM1_ESM.pdf [file 11042_2022_12624_MOESM1_ESM.pdf]
